# Supplementary material
Source: publisher figshare collection journal article supplement (https://gsajournals.figshare.com/ndownloader/files/14831861)
Supplement: Supplementary file 1 [file 14831861]

## Sheet: Table_S5__Random_Exp__Overlap
Table S5
Average overlap between two alleles for the AO model and the DAA model and each scenario of the Random experiment for an effectively infinite population
	Average Overlap			weighted mean	minimum	1% percentile	2% percentile	5% percentile	10% percentile
	% scenarios with mean of AO model sign. lower			0	0	0	0	0	0
	% scenarios with mean of AO model lower			0.0375	0.025	0.025	0.025	0.075	0.2625
	% scenarios with mean of both models equal			0	0	0	0	0	0
	% scenarios with mean of AO model higher			0.9625	0.975	0.975	0.975	0.925	0.7375
	% scenarios with mean of AO model sign. higher			0.125	0.6	0.55	0.4875	0.375	0.25
	average relative deviation AO model to DAA model			0.00152913	0.00777321	0.00699324	0.00624645	0.00444399	0.00259897
						Average Overlap
Scenario	Setting						mean	mean	rel. deviation	standard dev.	95% CI (lower)	95% CI (upper)	standard dev.	95% CI (lower)	95% CI (upper)	AO model	AO model	both models	AO model	AO model
Number	Max. intr. merit	Min. intr. merit	Range intr. merit	Multiplier f	Num. alleles init.	Statistic	DAA model	AO model	AO to DAA	DAA model	DAA model	DAA model	AO model	AO model	AO model	sign. lower	nonsign. lower	equal	nonsign. higher	sign. higher
1	0.1	0	0.1	2	50	weighted mean	0.00819514	0.00838922	0.0236831	0.000687455	0.00813488	0.0082554	0.000701738	0.00832771	0.00845073	FALSE	FALSE	FALSE	FALSE	TRUE
2	0.1	0	0.1	2	100	weighted mean	0.00882652	0.00892862	0.0115672	0.000397863	0.00877138	0.00888166	0.000405432	0.00887243	0.00898481	FALSE	FALSE	FALSE	FALSE	TRUE
3	0.1	0	0.1	2	250	weighted mean	0.00934043	0.00938506	0.00477828	0.000138287	0.0093021	0.00937876	0.000140965	0.00934599	0.00942414	FALSE	FALSE	FALSE	FALSE	TRUE
4	0.1	0	0.1	2	500	weighted mean	0.00954166	0.00956564	0.00251324	7.48374e-05	0.00950886	0.00957446	7.61386e-05	0.00953227	0.00959901	FALSE	FALSE	FALSE	TRUE	FALSE
5	0.1	0	0.1	2	1000	weighted mean	0.00970153	0.00971346	0.00122893	2.9842e-05	0.00967538	0.00972769	3.20486e-05	0.00968536	0.00974155	FALSE	FALSE	FALSE	TRUE	FALSE
6	0.1	0	0.1	10	50	weighted mean	0.0084024	0.00844046	0.00452997	0.000496764	0.00835885	0.00844594	0.00050224	0.00839644	0.00848448	FALSE	FALSE	FALSE	TRUE	FALSE
7	0.1	0	0.1	10	100	weighted mean	0.00892917	0.00894956	0.00228327	0.000262266	0.00889282	0.00896552	0.000262799	0.00891313	0.00898598	FALSE	FALSE	FALSE	TRUE	FALSE
8	0.1	0	0.1	10	250	weighted mean	0.00935583	0.00936451	0.000928613	0.000144172	0.00931586	0.00939579	0.000143918	0.00932462	0.00940441	FALSE	FALSE	FALSE	TRUE	FALSE
9	0.1	0	0.1	10	500	weighted mean	0.00952089	0.00952546	0.000479455	8.87448e-05	0.009482	0.00955978	8.94708e-05	0.00948624	0.00956467	FALSE	FALSE	FALSE	TRUE	FALSE
10	0.1	0	0.1	10	1000	weighted mean	0.00971506	0.00971762	0.000263717	8.87866e-06	0.00970727	0.00972284	8.69538e-06	0.00971	0.00972524	FALSE	FALSE	FALSE	TRUE	FALSE
11	0.55	0.45	0.1	2	50	weighted mean	0.283642	0.284304	0.00233697	0.00365771	0.283321	0.283962	0.00364138	0.283985	0.284624	FALSE	FALSE	FALSE	FALSE	TRUE
12	0.55	0.45	0.1	2	100	weighted mean	0.28937	0.289698	0.0011344	0.00240631	0.289036	0.289703	0.00242952	0.289361	0.290035	FALSE	FALSE	FALSE	TRUE	FALSE
13	0.55	0.45	0.1	2	250	weighted mean	0.294672	0.294788	0.000394077	0.0013532	0.294297	0.295047	0.00135656	0.294412	0.295164	FALSE	FALSE	FALSE	TRUE	FALSE
14	0.55	0.45	0.1	2	500	weighted mean	0.29679	0.296843	0.000177266	0.000514049	0.296565	0.297016	0.000515776	0.296617	0.297069	FALSE	FALSE	FALSE	TRUE	FALSE
15	0.55	0.45	0.1	2	1000	weighted mean	0.298685	0.298729	0.000146192	0.000430338	0.298308	0.299062	0.000411102	0.298369	0.299089	FALSE	FALSE	FALSE	TRUE	FALSE
16	0.55	0.45	0.1	10	50	weighted mean	0.283983	0.284117	0.000470887	0.00357167	0.28367	0.284296	0.00357643	0.283804	0.284431	FALSE	FALSE	FALSE	TRUE	FALSE
17	0.55	0.45	0.1	10	100	weighted mean	0.289672	0.289742	0.000240199	0.00230804	0.289352	0.289992	0.00229971	0.289423	0.29006	FALSE	FALSE	FALSE	TRUE	FALSE
18	0.55	0.45	0.1	10	250	weighted mean	0.294452	0.294496	0.000149155	0.000926029	0.294195	0.294708	0.00091598	0.294242	0.29475	FALSE	FALSE	FALSE	TRUE	FALSE
19	0.55	0.45	0.1	10	500	weighted mean	0.29703	0.297028	-4.80678e-06	0.000696414	0.296725	0.297335	0.000696631	0.296723	0.297334	FALSE	TRUE	FALSE	FALSE	FALSE
20	0.55	0.45	0.1	10	1000	weighted mean	0.298787	0.298787	1.4158e-06	0.000310475	0.298515	0.299059	0.000308997	0.298516	0.299058	FALSE	FALSE	FALSE	TRUE	FALSE
21	0.6	0.2	0.4	2	50	weighted mean	0.313054	0.315747	0.00860231	0.0120433	0.311998	0.31411	0.0121451	0.314682	0.316811	FALSE	FALSE	FALSE	FALSE	TRUE
22	0.6	0.2	0.4	2	100	weighted mean	0.327625	0.328991	0.00417102	0.00700376	0.326654	0.328596	0.00692291	0.328032	0.329951	FALSE	FALSE	FALSE	FALSE	TRUE
23	0.6	0.2	0.4	2	250	weighted mean	0.340736	0.341305	0.00166984	0.00279147	0.339962	0.341509	0.00291047	0.340498	0.342111	FALSE	FALSE	FALSE	TRUE	FALSE
24	0.6	0.2	0.4	2	500	weighted mean	0.347936	0.348281	0.000990699	0.00173384	0.347176	0.348696	0.00175178	0.347513	0.349048	FALSE	FALSE	FALSE	TRUE	FALSE
25	0.6	0.2	0.4	2	1000	weighted mean	0.350387	0.350508	0.000344682	0.00201823	0.348618	0.352156	0.00211401	0.348655	0.352361	FALSE	FALSE	FALSE	TRUE	FALSE
26	0.6	0.2	0.4	10	50	weighted mean	0.314989	0.315476	0.00154604	0.0119472	0.313942	0.316036	0.0119287	0.31443	0.316522	FALSE	FALSE	FALSE	TRUE	FALSE
27	0.6	0.2	0.4	10	100	weighted mean	0.329101	0.329405	0.000924204	0.00639473	0.328215	0.329988	0.00639556	0.328519	0.330292	FALSE	FALSE	FALSE	TRUE	FALSE
28	0.6	0.2	0.4	10	250	weighted mean	0.342426	0.342475	0.000143165	0.00323186	0.34153	0.343322	0.00324082	0.341576	0.343373	FALSE	FALSE	FALSE	TRUE	FALSE
29	0.6	0.2	0.4	10	500	weighted mean	0.346634	0.346698	0.000183635	0.0026951	0.345453	0.347815	0.00266369	0.34553	0.347865	FALSE	FALSE	FALSE	TRUE	FALSE
30	0.6	0.2	0.4	10	1000	weighted mean	0.350538	0.350589	0.000145062	0.00149591	0.349227	0.351849	0.00145788	0.349311	0.351867	FALSE	FALSE	FALSE	TRUE	FALSE
31	0.7	0.3	0.4	2	50	weighted mean	0.432597	0.435103	0.00579414	0.0144689	0.431328	0.433865	0.0142165	0.433857	0.436349	FALSE	FALSE	FALSE	FALSE	TRUE
32	0.7	0.3	0.4	2	100	weighted mean	0.450894	0.452057	0.00257802	0.00896273	0.449652	0.452136	0.00902834	0.450805	0.453308	FALSE	FALSE	FALSE	TRUE	FALSE
33	0.7	0.3	0.4	2	250	weighted mean	0.465919	0.466491	0.00122761	0.00500222	0.464533	0.467306	0.0049912	0.465108	0.467875	FALSE	FALSE	FALSE	TRUE	FALSE
34	0.7	0.3	0.4	2	500	weighted mean	0.47345	0.473645	0.000413294	0.00238025	0.472407	0.474493	0.00246398	0.472566	0.474725	FALSE	FALSE	FALSE	TRUE	FALSE
35	0.7	0.3	0.4	2	1000	weighted mean	0.479381	0.479475	0.000197517	0.00186422	0.477747	0.481015	0.00179806	0.477899	0.481051	FALSE	FALSE	FALSE	TRUE	FALSE
36	0.7	0.3	0.4	10	50	weighted mean	0.435742	0.436153	0.000943086	0.0132614	0.434579	0.436904	0.0132084	0.434995	0.43731	FALSE	FALSE	FALSE	TRUE	FALSE
37	0.7	0.3	0.4	10	100	weighted mean	0.452822	0.453048	0.000499442	0.00808509	0.451702	0.453943	0.00816643	0.451917	0.45418	FALSE	FALSE	FALSE	TRUE	FALSE
38	0.7	0.3	0.4	10	250	weighted mean	0.465733	0.465779	0.000100114	0.00457248	0.464465	0.467	0.00461275	0.464501	0.467058	FALSE	FALSE	FALSE	TRUE	FALSE
39	0.7	0.3	0.4	10	500	weighted mean	0.47299	0.473042	0.00010957	0.00197676	0.472124	0.473856	0.00196126	0.472182	0.473901	FALSE	FALSE	FALSE	TRUE	FALSE
40	0.7	0.3	0.4	10	1000	weighted mean	0.478271	0.478301	6.17882e-05	0.00239852	0.476169	0.480374	0.00241741	0.476182	0.48042	FALSE	FALSE	FALSE	TRUE	FALSE
41	0.8	0.4	0.4	2	50	weighted mean	0.572902	0.575152	0.00392751	0.0177229	0.571349	0.574456	0.0175795	0.573612	0.576693	FALSE	FALSE	FALSE	FALSE	TRUE
42	0.8	0.4	0.4	2	100	weighted mean	0.594812	0.595851	0.00174669	0.00931392	0.593521	0.596103	0.00912022	0.594587	0.597115	FALSE	FALSE	FALSE	TRUE	FALSE
43	0.8	0.4	0.4	2	250	weighted mean	0.611487	0.611771	0.000465294	0.00484042	0.610145	0.612829	0.00476221	0.610451	0.613091	FALSE	FALSE	FALSE	TRUE	FALSE
44	0.8	0.4	0.4	2	500	weighted mean	0.619281	0.619504	0.000360267	0.00318016	0.617887	0.620675	0.00327605	0.618068	0.62094	FALSE	FALSE	FALSE	TRUE	FALSE
45	0.8	0.4	0.4	2	1000	weighted mean	0.626925	0.626958	5.17619e-05	0.00118411	0.625887	0.627963	0.00101837	0.626065	0.62785	FALSE	FALSE	FALSE	TRUE	FALSE
46	0.8	0.4	0.4	10	50	weighted mean	0.575237	0.575665	0.000744795	0.0171092	0.573737	0.576736	0.0172494	0.574153	0.577177	FALSE	FALSE	FALSE	TRUE	FALSE
47	0.8	0.4	0.4	10	100	weighted mean	0.595558	0.595708	0.000253063	0.00946553	0.594246	0.596869	0.00952801	0.594388	0.597029	FALSE	FALSE	FALSE	TRUE	FALSE
48	0.8	0.4	0.4	10	250	weighted mean	0.612481	0.61251	4.67465e-05	0.00486124	0.611133	0.613828	0.00490165	0.611151	0.613868	FALSE	FALSE	FALSE	TRUE	FALSE
49	0.8	0.4	0.4	10	500	weighted mean	0.620398	0.620381	-2.71887e-05	0.00291283	0.619121	0.621675	0.00288349	0.619117	0.621645	FALSE	TRUE	FALSE	FALSE	FALSE
50	0.8	0.4	0.4	10	1000	weighted mean	0.62716	0.627208	7.69085e-05	0.00112729	0.626172	0.628148	0.00119888	0.626158	0.628259	FALSE	FALSE	FALSE	TRUE	FALSE
51	0.9	0.1	0.8	2	50	weighted mean	0.697942	0.70199	0.00579915	0.0317613	0.695158	0.700726	0.0312311	0.699252	0.704727	FALSE	FALSE	FALSE	FALSE	TRUE
52	0.9	0.1	0.8	2	100	weighted mean	0.735189	0.737145	0.00266159	0.0192103	0.732526	0.737851	0.0188721	0.73453	0.739761	FALSE	FALSE	FALSE	TRUE	FALSE
53	0.9	0.1	0.8	2	250	weighted mean	0.763086	0.763714	0.000821957	0.0111731	0.759989	0.766183	0.0110282	0.760657	0.766771	FALSE	FALSE	FALSE	TRUE	FALSE
54	0.9	0.1	0.8	2	500	weighted mean	0.775978	0.775997	2.48795e-05	0.00690823	0.77295	0.779005	0.00710988	0.772881	0.779113	FALSE	FALSE	FALSE	TRUE	FALSE
55	0.9	0.1	0.8	2	1000	weighted mean	0.785211	0.785168	-5.43681e-05	0.00191691	0.783531	0.786891	0.00173285	0.783649	0.786687	FALSE	TRUE	FALSE	FALSE	FALSE
56	0.9	0.1	0.8	10	50	weighted mean	0.703229	0.70394	0.00101174	0.0310669	0.700506	0.705952	0.0308651	0.701235	0.706646	FALSE	FALSE	FALSE	TRUE	FALSE
57	0.9	0.1	0.8	10	100	weighted mean	0.736187	0.736583	0.000538495	0.0205033	0.733345	0.739028	0.0204496	0.733749	0.739417	FALSE	FALSE	FALSE	TRUE	FALSE
58	0.9	0.1	0.8	10	250	weighted mean	0.762765	0.762839	9.73833e-05	0.0101259	0.759958	0.765571	0.0100002	0.760067	0.765611	FALSE	FALSE	FALSE	TRUE	FALSE
59	0.9	0.1	0.8	10	500	weighted mean	0.777829	0.77791	0.000104672	0.0046545	0.775789	0.779869	0.00478327	0.775814	0.780007	FALSE	FALSE	FALSE	TRUE	FALSE
60	0.9	0.1	0.8	10	1000	weighted mean	0.786614	0.786711	0.000122804	0.000580255	0.786105	0.787123	0.000539883	0.786237	0.787184	FALSE	FALSE	FALSE	TRUE	FALSE
61	1	0	1	2	50	weighted mean	0.871294	0.876837	0.00636178	0.0496786	0.866939	0.875648	0.0488067	0.872559	0.881115	FALSE	FALSE	FALSE	FALSE	TRUE
62	1	0	1	2	100	weighted mean	0.924625	0.927059	0.00263221	0.0274808	0.920816	0.928433	0.0276483	0.923227	0.93089	FALSE	FALSE	FALSE	TRUE	FALSE
63	1	0	1	2	250	weighted mean	0.956963	0.9581	0.00118848	0.0153883	0.952698	0.961229	0.0154701	0.953812	0.962389	FALSE	FALSE	FALSE	TRUE	FALSE
64	1	0	1	2	500	weighted mean	0.975809	0.976368	0.00057302	0.00761919	0.97247	0.979148	0.00782389	0.972939	0.979797	FALSE	FALSE	FALSE	TRUE	FALSE
65	1	0	1	2	1000	weighted mean	0.985199	0.985641	0.000447803	0.00229742	0.983186	0.987213	0.00248594	0.983462	0.98782	FALSE	FALSE	FALSE	TRUE	FALSE
66	1	0	1	10	50	weighted mean	0.882839	0.884183	0.00152297	0.0475961	0.878667	0.887011	0.0476628	0.880005	0.888361	FALSE	FALSE	FALSE	TRUE	FALSE
67	1	0	1	10	100	weighted mean	0.930244	0.931087	0.000906037	0.0250651	0.92677	0.933718	0.0248312	0.927645	0.934528	FALSE	FALSE	FALSE	TRUE	FALSE
68	1	0	1	10	250	weighted mean	0.961895	0.962197	0.000314362	0.0126565	0.958387	0.965403	0.0126304	0.958696	0.965698	FALSE	FALSE	FALSE	TRUE	FALSE
69	1	0	1	10	500	weighted mean	0.97641	0.976501	9.35047e-05	0.00728443	0.973217	0.979602	0.00733033	0.973288	0.979714	FALSE	FALSE	FALSE	TRUE	FALSE
70	1	0	1	10	1000	weighted mean	0.986248	0.986284	3.68401e-05	0.00438995	0.9824	0.990096	0.00439417	0.982433	0.990136	FALSE	FALSE	FALSE	TRUE	FALSE
71	1	0.9	0.1	2	50	weighted mean	0.975488	0.976136	0.00066394	0.00817925	0.974771	0.976205	0.00818535	0.975418	0.976853	FALSE	FALSE	FALSE	TRUE	FALSE
72	1	0.9	0.1	2	100	weighted mean	0.98472	0.985025	0.000309163	0.00559827	0.983944	0.985496	0.00562414	0.984245	0.985804	FALSE	FALSE	FALSE	TRUE	FALSE
73	1	0.9	0.1	2	250	weighted mean	0.991289	0.991445	0.000156717	0.00226959	0.99066	0.991919	0.00227353	0.990815	0.992075	FALSE	FALSE	FALSE	TRUE	FALSE
74	1	0.9	0.1	2	500	weighted mean	0.994175	0.994253	7.76372e-05	0.0017733	0.993398	0.994953	0.00175965	0.993481	0.995024	FALSE	FALSE	FALSE	TRUE	FALSE
75	1	0.9	0.1	2	1000	weighted mean	0.997037	0.997071	3.37882e-05	0.000824089	0.996315	0.997759	0.000834569	0.996339	0.997802	FALSE	FALSE	FALSE	TRUE	FALSE
76	1	0.9	0.1	10	50	weighted mean	0.977278	0.977429	0.000154972	0.00739656	0.976629	0.977926	0.00741062	0.97678	0.978079	FALSE	FALSE	FALSE	TRUE	FALSE
77	1	0.9	0.1	10	100	weighted mean	0.984505	0.984586	8.29665e-05	0.00502812	0.983808	0.985202	0.00503412	0.983889	0.985284	FALSE	FALSE	FALSE	TRUE	FALSE
78	1	0.9	0.1	10	250	weighted mean	0.991901	0.991925	2.41136e-05	0.00237383	0.991243	0.992559	0.00239418	0.991261	0.992588	FALSE	FALSE	FALSE	TRUE	FALSE
79	1	0.9	0.1	10	500	weighted mean	0.994868	0.994883	1.51944e-05	0.00108751	0.994391	0.995344	0.0010816	0.994409	0.995357	FALSE	FALSE	FALSE	TRUE	FALSE
80	1	0.9	0.1	10	1000	weighted mean	0.996815	0.996828	1.37097e-05	0.000505955	0.996371	0.997258	0.000502376	0.996388	0.997269	FALSE	FALSE	FALSE	TRUE	FALSE
1	0.1	0	0.1	2	50	minimum	0.006413	0.00657201	0.0247951	0.000826812	0.00634053	0.00648547	0.000816134	0.00650047	0.00664355	FALSE	FALSE	FALSE	FALSE	TRUE
2	0.1	0	0.1	2	100	minimum	0.00748154	0.00758975	0.0144632	0.000476877	0.00741545	0.00754763	0.000479841	0.00752324	0.00765625	FALSE	FALSE	FALSE	FALSE	TRUE
3	0.1	0	0.1	2	250	minimum	0.00846613	0.00851522	0.00579883	0.000256395	0.00839506	0.0085372	0.000254154	0.00844478	0.00858567	FALSE	FALSE	FALSE	TRUE	FALSE
4	0.1	0	0.1	2	500	minimum	0.00892522	0.00897143	0.00517762	0.000119886	0.00887268	0.00897776	8.44596e-05	0.00893441	0.00900845	FALSE	FALSE	FALSE	TRUE	FALSE
5	0.1	0	0.1	2	1000	minimum	0.00923481	0.00925349	0.00202246	7.47366e-05	0.0091693	0.00930032	6.94076e-05	0.00919265	0.00931433	FALSE	FALSE	FALSE	TRUE	FALSE
6	0.1	0	0.1	10	50	minimum	0.00721568	0.00726189	0.00640377	0.000575982	0.0071652	0.00726617	0.000575553	0.00721144	0.00731234	FALSE	FALSE	FALSE	TRUE	FALSE
7	0.1	0	0.1	10	100	minimum	0.00800782	0.00802801	0.00252088	0.00034459	0.00796007	0.00805558	0.00033973	0.00798093	0.00807509	FALSE	FALSE	FALSE	TRUE	FALSE
8	0.1	0	0.1	10	250	minimum	0.00871646	0.00872901	0.00144053	0.000210319	0.00865816	0.00877475	0.000198563	0.00867397	0.00878405	FALSE	FALSE	FALSE	TRUE	FALSE
9	0.1	0	0.1	10	500	minimum	0.00909352	0.00909263	-9.76173e-05	9.80945e-05	0.00905053	0.00913651	9.83127e-05	0.00904954	0.00913572	FALSE	TRUE	FALSE	FALSE	FALSE
10	0.1	0	0.1	10	1000	minimum	0.00937799	0.00937766	-3.47922e-05	2.22539e-05	0.00935848	0.00939749	2.23385e-05	0.00935808	0.00939724	FALSE	TRUE	FALSE	FALSE	FALSE
11	0.55	0.45	0.1	2	50	minimum	0.266206	0.26818	0.00741507	0.00482874	0.265783	0.266629	0.00428623	0.267804	0.268555	FALSE	FALSE	FALSE	FALSE	TRUE
12	0.55	0.45	0.1	2	100	minimum	0.276601	0.278068	0.00530331	0.00297695	0.276189	0.277014	0.00282049	0.277677	0.278459	FALSE	FALSE	FALSE	FALSE	TRUE
13	0.55	0.45	0.1	2	250	minimum	0.286448	0.287354	0.00316354	0.00174963	0.285963	0.286933	0.00176745	0.286864	0.287844	FALSE	FALSE	FALSE	FALSE	TRUE
14	0.55	0.45	0.1	2	500	minimum	0.290763	0.291318	0.0019085	0.000866671	0.290384	0.291143	0.000672724	0.291023	0.291613	FALSE	FALSE	FALSE	FALSE	TRUE
15	0.55	0.45	0.1	2	1000	minimum	0.294284	0.294616	0.00112838	0.000822613	0.293563	0.295005	0.000645562	0.29405	0.295182	FALSE	FALSE	FALSE	TRUE	FALSE
16	0.55	0.45	0.1	10	50	minimum	0.268161	0.268822	0.00246421	0.00427108	0.267787	0.268536	0.00408278	0.268464	0.26918	FALSE	FALSE	FALSE	FALSE	TRUE
17	0.55	0.45	0.1	10	100	minimum	0.277984	0.278401	0.00150012	0.00262489	0.27762	0.278348	0.00257169	0.278045	0.278757	FALSE	FALSE	FALSE	FALSE	TRUE
18	0.55	0.45	0.1	10	250	minimum	0.286804	0.287108	0.00106231	0.00130576	0.286442	0.287166	0.001215	0.286771	0.287445	FALSE	FALSE	FALSE	TRUE	FALSE
19	0.55	0.45	0.1	10	500	minimum	0.291483	0.291756	0.000936108	0.000868628	0.291102	0.291864	0.000811369	0.2914	0.292111	FALSE	FALSE	FALSE	TRUE	FALSE
20	0.55	0.45	0.1	10	1000	minimum	0.294937	0.294976	0.000132418	0.000493336	0.294504	0.295369	0.000486859	0.294549	0.295403	FALSE	FALSE	FALSE	TRUE	FALSE
21	0.6	0.2	0.4	2	50	minimum	0.277985	0.283239	0.0188972	0.0163221	0.276555	0.279416	0.0138114	0.282028	0.284449	FALSE	FALSE	FALSE	FALSE	TRUE
22	0.6	0.2	0.4	2	100	minimum	0.299508	0.303867	0.0145545	0.00935488	0.298211	0.300804	0.0081316	0.30274	0.304994	FALSE	FALSE	FALSE	FALSE	TRUE
23	0.6	0.2	0.4	2	250	minimum	0.321769	0.324925	0.00980872	0.00453448	0.320512	0.323026	0.00382228	0.323866	0.325985	FALSE	FALSE	FALSE	FALSE	TRUE
24	0.6	0.2	0.4	2	500	minimum	0.335208	0.336343	0.00338427	0.0028948	0.33394	0.336477	0.00226099	0.335352	0.337334	FALSE	FALSE	FALSE	TRUE	FALSE
25	0.6	0.2	0.4	2	1000	minimum	0.340681	0.341726	0.0030665	0.00230651	0.338659	0.342703	0.002304	0.339706	0.343745	FALSE	FALSE	FALSE	TRUE	FALSE
26	0.6	0.2	0.4	10	50	minimum	0.283947	0.285578	0.00574521	0.0136906	0.282747	0.285147	0.013447	0.2844	0.286757	FALSE	FALSE	FALSE	FALSE	TRUE
27	0.6	0.2	0.4	10	100	minimum	0.304152	0.305436	0.00422212	0.00796351	0.303048	0.305256	0.00751117	0.304395	0.306477	FALSE	FALSE	FALSE	FALSE	TRUE
28	0.6	0.2	0.4	10	250	minimum	0.325662	0.326316	0.0020074	0.00361153	0.324661	0.326663	0.00395532	0.325219	0.327412	FALSE	FALSE	FALSE	TRUE	FALSE
29	0.6	0.2	0.4	10	500	minimum	0.334493	0.335133	0.00191343	0.00363681	0.332899	0.336087	0.00319898	0.333731	0.336535	FALSE	FALSE	FALSE	TRUE	FALSE
30	0.6	0.2	0.4	10	1000	minimum	0.342306	0.342404	0.000286359	0.00168603	0.340828	0.343784	0.00179671	0.340829	0.343979	FALSE	FALSE	FALSE	TRUE	FALSE
31	0.7	0.3	0.4	2	50	minimum	0.388513	0.394355	0.0150357	0.0195155	0.386802	0.390224	0.0167162	0.392889	0.39582	FALSE	FALSE	FALSE	FALSE	TRUE
32	0.7	0.3	0.4	2	100	minimum	0.417525	0.421455	0.00941087	0.0117043	0.415903	0.419147	0.0101871	0.420043	0.422866	FALSE	FALSE	FALSE	FALSE	TRUE
33	0.7	0.3	0.4	2	250	minimum	0.442672	0.445077	0.00543085	0.00711377	0.440701	0.444644	0.00637318	0.44331	0.446843	FALSE	FALSE	FALSE	FALSE	TRUE
34	0.7	0.3	0.4	2	500	minimum	0.457022	0.458221	0.00262427	0.00347473	0.455499	0.458545	0.00267609	0.457048	0.459394	FALSE	FALSE	FALSE	TRUE	FALSE
35	0.7	0.3	0.4	2	1000	minimum	0.467226	0.468279	0.00225389	0.00304645	0.464556	0.469897	0.00218701	0.466362	0.470196	FALSE	FALSE	FALSE	TRUE	FALSE
36	0.7	0.3	0.4	10	50	minimum	0.395765	0.397464	0.00429096	0.0162079	0.394345	0.397186	0.0151924	0.396132	0.398795	FALSE	FALSE	FALSE	FALSE	TRUE
37	0.7	0.3	0.4	10	100	minimum	0.421357	0.422593	0.00293297	0.0100066	0.41997	0.422744	0.00931492	0.421302	0.423884	FALSE	FALSE	FALSE	TRUE	FALSE
38	0.7	0.3	0.4	10	250	minimum	0.444647	0.445178	0.00119515	0.00634167	0.442889	0.446405	0.00613662	0.443477	0.446879	FALSE	FALSE	FALSE	TRUE	FALSE
39	0.7	0.3	0.4	10	500	minimum	0.45788	0.458578	0.00152588	0.00310575	0.456519	0.459241	0.00254941	0.457461	0.459696	FALSE	FALSE	FALSE	TRUE	FALSE
40	0.7	0.3	0.4	10	1000	minimum	0.467504	0.467752	0.0005298	0.00271015	0.465128	0.46988	0.00271732	0.46537	0.470134	FALSE	FALSE	FALSE	TRUE	FALSE
41	0.8	0.4	0.4	2	50	minimum	0.51636	0.524751	0.0162498	0.0238327	0.514271	0.518449	0.0195845	0.523034	0.526468	FALSE	FALSE	FALSE	FALSE	TRUE
42	0.8	0.4	0.4	2	100	minimum	0.551535	0.557721	0.0112152	0.0133842	0.54968	0.55339	0.0110831	0.556185	0.559257	FALSE	FALSE	FALSE	FALSE	TRUE
43	0.8	0.4	0.4	2	250	minimum	0.58414	0.586608	0.00422507	0.00713955	0.582161	0.586119	0.00649086	0.584809	0.588407	FALSE	FALSE	FALSE	FALSE	TRUE
44	0.8	0.4	0.4	2	500	minimum	0.599273	0.600622	0.00225156	0.0046051	0.597255	0.601291	0.00372398	0.59899	0.602254	FALSE	FALSE	FALSE	TRUE	FALSE
45	0.8	0.4	0.4	2	1000	minimum	0.612592	0.61371	0.00182468	0.00134521	0.611413	0.613771	0.00157348	0.612331	0.615089	FALSE	FALSE	FALSE	TRUE	FALSE
46	0.8	0.4	0.4	10	50	minimum	0.523844	0.525979	0.00407643	0.0198118	0.522107	0.52558	0.0186896	0.524341	0.527617	FALSE	FALSE	FALSE	FALSE	TRUE
47	0.8	0.4	0.4	10	100	minimum	0.556358	0.557946	0.00285368	0.0121927	0.554668	0.558048	0.011351	0.556372	0.559519	FALSE	FALSE	FALSE	TRUE	FALSE
48	0.8	0.4	0.4	10	250	minimum	0.587759	0.587825	0.000111221	0.00650621	0.585956	0.589563	0.00613638	0.586124	0.589526	FALSE	FALSE	FALSE	TRUE	FALSE
49	0.8	0.4	0.4	10	500	minimum	0.601994	0.602736	0.00123249	0.00284839	0.600746	0.603243	0.00288618	0.601471	0.604001	FALSE	FALSE	FALSE	TRUE	FALSE
50	0.8	0.4	0.4	10	1000	minimum	0.61354	0.614277	0.00120073	0.00195291	0.611828	0.615252	0.00236198	0.612207	0.616347	FALSE	FALSE	FALSE	TRUE	FALSE
51	0.9	0.1	0.8	2	50	minimum	0.604716	0.620337	0.0258326	0.044191	0.600842	0.608589	0.035124	0.617259	0.623416	FALSE	FALSE	FALSE	FALSE	TRUE
52	0.9	0.1	0.8	2	100	minimum	0.661538	0.674177	0.0191054	0.0264432	0.657873	0.665203	0.0216171	0.671181	0.677173	FALSE	FALSE	FALSE	FALSE	TRUE
53	0.9	0.1	0.8	2	250	minimum	0.713818	0.72018	0.00891375	0.0166591	0.7092	0.718435	0.0127334	0.716651	0.72371	FALSE	FALSE	FALSE	FALSE	TRUE
54	0.9	0.1	0.8	2	500	minimum	0.741495	0.744284	0.00376036	0.00774747	0.7381	0.744891	0.00804204	0.740759	0.747808	FALSE	FALSE	FALSE	TRUE	FALSE
55	0.9	0.1	0.8	2	1000	minimum	0.759965	0.76368	0.00488783	0.00364631	0.756769	0.763161	0.00288641	0.76115	0.76621	FALSE	FALSE	FALSE	FALSE	TRUE
56	0.9	0.1	0.8	10	50	minimum	0.619985	0.624573	0.00739983	0.0362374	0.616809	0.623161	0.0344584	0.621552	0.627593	FALSE	FALSE	FALSE	FALSE	TRUE
57	0.9	0.1	0.8	10	100	minimum	0.670213	0.674722	0.00672789	0.0245181	0.666815	0.673611	0.023336	0.671487	0.677956	FALSE	FALSE	FALSE	FALSE	TRUE
58	0.9	0.1	0.8	10	250	minimum	0.720199	0.72129	0.0015154	0.0128869	0.716627	0.723771	0.0128048	0.717741	0.724839	FALSE	FALSE	FALSE	TRUE	FALSE
59	0.9	0.1	0.8	10	500	minimum	0.745526	0.746088	0.00075411	0.00628561	0.742771	0.74828	0.00591785	0.743494	0.748681	FALSE	FALSE	FALSE	TRUE	FALSE
60	0.9	0.1	0.8	10	1000	minimum	0.763847	0.765938	0.00273818	0.00220286	0.761916	0.765778	0.00199453	0.76419	0.767687	FALSE	FALSE	FALSE	FALSE	TRUE
61	1	0	1	2	50	minimum	0.716717	0.765424	0.0679572	0.0676409	0.710788	0.722646	0.0480123	0.761215	0.769632	FALSE	FALSE	FALSE	FALSE	TRUE
62	1	0	1	2	100	minimum	0.799148	0.834721	0.0445138	0.038643	0.793793	0.804504	0.0288625	0.830721	0.838722	FALSE	FALSE	FALSE	FALSE	TRUE
63	1	0	1	2	250	minimum	0.868406	0.894738	0.0303217	0.0258922	0.86123	0.875583	0.0132267	0.891072	0.898404	FALSE	FALSE	FALSE	FALSE	TRUE
64	1	0	1	2	500	minimum	0.909421	0.928084	0.0205212	0.0111892	0.904517	0.914325	0.00763234	0.924739	0.931429	FALSE	FALSE	FALSE	FALSE	TRUE
65	1	0	1	2	1000	minimum	0.938996	0.950888	0.0126646	0.00449673	0.935054	0.942937	0.00629415	0.945371	0.956405	FALSE	FALSE	FALSE	FALSE	TRUE
66	1	0	1	10	50	minimum	0.75019	0.768941	0.0249945	0.0518373	0.745647	0.754734	0.0466877	0.764849	0.773033	FALSE	FALSE	FALSE	FALSE	TRUE
67	1	0	1	10	100	minimum	0.828295	0.840161	0.0143249	0.031034	0.823994	0.832596	0.0260489	0.83655	0.843771	FALSE	FALSE	FALSE	FALSE	TRUE
68	1	0	1	10	250	minimum	0.890138	0.897589	0.00837031	0.0161856	0.885652	0.894624	0.0150489	0.893417	0.90176	FALSE	FALSE	FALSE	FALSE	TRUE
69	1	0	1	10	500	minimum	0.922108	0.927041	0.00534922	0.010918	0.917323	0.926893	0.00915377	0.923029	0.931053	FALSE	FALSE	FALSE	FALSE	TRUE
70	1	0	1	10	1000	minimum	0.945082	0.950416	0.00564463	0.00146264	0.9438	0.946364	0.0038827	0.947013	0.95382	FALSE	FALSE	FALSE	FALSE	TRUE
71	1	0.9	0.1	2	50	minimum	0.91149	0.927818	0.0179132	0.0107856	0.910545	0.912436	0.00743617	0.927166	0.92847	FALSE	FALSE	FALSE	FALSE	TRUE
72	1	0.9	0.1	2	100	minimum	0.937791	0.949586	0.0125784	0.00736554	0.93677	0.938811	0.0050903	0.948881	0.950292	FALSE	FALSE	FALSE	FALSE	TRUE
73	1	0.9	0.1	2	250	minimum	0.96129	0.967948	0.00692611	0.00384571	0.960224	0.962356	0.00241635	0.967278	0.968618	FALSE	FALSE	FALSE	FALSE	TRUE
74	1	0.9	0.1	2	500	minimum	0.972884	0.977498	0.00474304	0.00189796	0.972052	0.973716	0.00188509	0.976672	0.978325	FALSE	FALSE	FALSE	FALSE	TRUE
75	1	0.9	0.1	2	1000	minimum	0.979878	0.984353	0.00456705	0.00101289	0.97899	0.980766	0.000445404	0.983963	0.984744	FALSE	FALSE	FALSE	FALSE	TRUE
76	1	0.9	0.1	10	50	minimum	0.923126	0.929279	0.00666534	0.00859771	0.922373	0.92388	0.00689348	0.928675	0.929883	FALSE	FALSE	FALSE	FALSE	TRUE
77	1	0.9	0.1	10	100	minimum	0.944259	0.948771	0.00477872	0.00571995	0.943466	0.945051	0.00446257	0.948152	0.949389	FALSE	FALSE	FALSE	FALSE	TRUE
78	1	0.9	0.1	10	250	minimum	0.965605	0.968465	0.00296115	0.00281728	0.964824	0.966386	0.00226055	0.967838	0.969091	FALSE	FALSE	FALSE	FALSE	TRUE
79	1	0.9	0.1	10	500	minimum	0.976744	0.978321	0.00161473	0.00178172	0.975963	0.977524	0.00156453	0.977635	0.979006	FALSE	FALSE	FALSE	FALSE	TRUE
80	1	0.9	0.1	10	1000	minimum	0.983201	0.984135	0.000950528	0.000473198	0.982786	0.983616	0.000502927	0.983695	0.984576	FALSE	FALSE	FALSE	FALSE	TRUE
1	0.1	0	0.1	2	50	1% percentile	0.00646211	0.00661943	0.0243445	0.000806867	0.00639139	0.00653284	0.000798765	0.00654941	0.00668944	FALSE	FALSE	FALSE	FALSE	TRUE
2	0.1	0	0.1	2	100	1% percentile	0.00752702	0.00763163	0.0138989	0.000456581	0.00746374	0.00759029	0.000462545	0.00756753	0.00769574	FALSE	FALSE	FALSE	FALSE	TRUE
3	0.1	0	0.1	2	250	1% percentile	0.00850495	0.00855004	0.00530134	0.00024654	0.00843662	0.00857329	0.000242535	0.00848281	0.00861727	FALSE	FALSE	FALSE	TRUE	FALSE
4	0.1	0	0.1	2	500	1% percentile	0.0089559	0.00899612	0.00449088	0.000106312	0.00890931	0.00900249	8.3064e-05	0.00895972	0.00903253	FALSE	FALSE	FALSE	TRUE	FALSE
5	0.1	0	0.1	2	1000	1% percentile	0.00926138	0.00928581	0.00263768	7.51688e-05	0.00919549	0.00932727	6.36375e-05	0.00923003	0.00934159	FALSE	FALSE	FALSE	TRUE	FALSE
6	0.1	0	0.1	10	50	1% percentile	0.00724365	0.00728823	0.00615303	0.000570687	0.00719363	0.00729368	0.000570065	0.00723826	0.00733819	FALSE	FALSE	FALSE	TRUE	FALSE
7	0.1	0	0.1	10	100	1% percentile	0.00803398	0.00805318	0.00239042	0.000340657	0.00798677	0.00808119	0.000335231	0.00800672	0.00809964	FALSE	FALSE	FALSE	TRUE	FALSE
8	0.1	0	0.1	10	250	1% percentile	0.00873924	0.00875162	0.00141738	0.000205167	0.00868237	0.00879611	0.000193705	0.00869793	0.00880531	FALSE	FALSE	FALSE	TRUE	FALSE
9	0.1	0	0.1	10	500	1% percentile	0.00910589	0.00910549	-4.36683e-05	9.2604e-05	0.00906531	0.00914648	9.25686e-05	0.00906492	0.00914606	FALSE	TRUE	FALSE	FALSE	FALSE
10	0.1	0	0.1	10	1000	1% percentile	0.00939509	0.0093949	-2.02093e-05	2.76504e-05	0.00937085	0.00941932	2.75984e-05	0.00937071	0.00941909	FALSE	TRUE	FALSE	FALSE	FALSE
11	0.55	0.45	0.1	2	50	1% percentile	0.266778	0.268555	0.00666058	0.00473727	0.266363	0.267193	0.00424632	0.268183	0.268927	FALSE	FALSE	FALSE	FALSE	TRUE
12	0.55	0.45	0.1	2	100	1% percentile	0.277076	0.278354	0.00461148	0.0029297	0.27667	0.277482	0.00279383	0.277967	0.278741	FALSE	FALSE	FALSE	FALSE	TRUE
13	0.55	0.45	0.1	2	250	1% percentile	0.286945	0.287585	0.00223054	0.00173965	0.286463	0.287428	0.00174223	0.287102	0.288068	FALSE	FALSE	FALSE	FALSE	TRUE
14	0.55	0.45	0.1	2	500	1% percentile	0.291078	0.291546	0.0016099	0.00077615	0.290738	0.291418	0.000649072	0.291262	0.291831	FALSE	FALSE	FALSE	FALSE	TRUE
15	0.55	0.45	0.1	2	1000	1% percentile	0.294478	0.294828	0.00118666	0.000731858	0.293837	0.29512	0.000489723	0.294398	0.295257	FALSE	FALSE	FALSE	TRUE	FALSE
16	0.55	0.45	0.1	10	50	1% percentile	0.268525	0.269091	0.00211039	0.00424696	0.268152	0.268897	0.00407658	0.268734	0.269449	FALSE	FALSE	FALSE	FALSE	TRUE
17	0.55	0.45	0.1	10	100	1% percentile	0.278292	0.278616	0.00116437	0.00260407	0.277931	0.278652	0.00257862	0.278258	0.278973	FALSE	FALSE	FALSE	TRUE	FALSE
18	0.55	0.45	0.1	10	250	1% percentile	0.287036	0.287231	0.000679725	0.00123281	0.286694	0.287377	0.0011785	0.286904	0.287557	FALSE	FALSE	FALSE	TRUE	FALSE
19	0.55	0.45	0.1	10	500	1% percentile	0.291701	0.291869	0.000573396	0.000886977	0.291313	0.29209	0.000851767	0.291495	0.292242	FALSE	FALSE	FALSE	TRUE	FALSE
20	0.55	0.45	0.1	10	1000	1% percentile	0.295042	0.295074	0.000106604	0.00047801	0.294623	0.295461	0.000456998	0.294673	0.295474	FALSE	FALSE	FALSE	TRUE	FALSE
21	0.6	0.2	0.4	2	50	1% percentile	0.278909	0.283845	0.0176967	0.0160526	0.277502	0.280316	0.0137263	0.282641	0.285048	FALSE	FALSE	FALSE	FALSE	TRUE
22	0.6	0.2	0.4	2	100	1% percentile	0.300389	0.304363	0.0132308	0.00914377	0.299122	0.301656	0.00810951	0.303239	0.305487	FALSE	FALSE	FALSE	FALSE	TRUE
23	0.6	0.2	0.4	2	250	1% percentile	0.322475	0.325184	0.00840136	0.00431627	0.321278	0.323671	0.00377819	0.324137	0.326231	FALSE	FALSE	FALSE	FALSE	TRUE
24	0.6	0.2	0.4	2	500	1% percentile	0.335604	0.336632	0.00306265	0.00285084	0.334355	0.336854	0.00238973	0.335585	0.337679	FALSE	FALSE	FALSE	TRUE	FALSE
25	0.6	0.2	0.4	2	1000	1% percentile	0.341109	0.341983	0.00256341	0.00219035	0.339189	0.343029	0.00241224	0.339869	0.344098	FALSE	FALSE	FALSE	TRUE	FALSE
26	0.6	0.2	0.4	10	50	1% percentile	0.284592	0.286095	0.00528248	0.013636	0.283396	0.285787	0.0134455	0.284917	0.287274	FALSE	FALSE	FALSE	FALSE	TRUE
27	0.6	0.2	0.4	10	100	1% percentile	0.30469	0.305832	0.00374812	0.00791147	0.303593	0.305786	0.00749987	0.304792	0.306871	FALSE	FALSE	FALSE	FALSE	TRUE
28	0.6	0.2	0.4	10	250	1% percentile	0.326076	0.32662	0.00166935	0.00366985	0.325058	0.327093	0.00399804	0.325512	0.327728	FALSE	FALSE	FALSE	TRUE	FALSE
29	0.6	0.2	0.4	10	500	1% percentile	0.334847	0.335399	0.00164806	0.00361223	0.333264	0.33643	0.0032134	0.333991	0.336807	FALSE	FALSE	FALSE	TRUE	FALSE
30	0.6	0.2	0.4	10	1000	1% percentile	0.342481	0.342541	0.00017478	0.00169866	0.340992	0.34397	0.00174403	0.341012	0.34407	FALSE	FALSE	FALSE	TRUE	FALSE
31	0.7	0.3	0.4	2	50	1% percentile	0.38966	0.395129	0.0140357	0.0192133	0.387976	0.391344	0.0166473	0.39367	0.396589	FALSE	FALSE	FALSE	FALSE	TRUE
32	0.7	0.3	0.4	2	100	1% percentile	0.418488	0.422024	0.00844967	0.0115536	0.416887	0.42009	0.0101722	0.420615	0.423434	FALSE	FALSE	FALSE	FALSE	TRUE
33	0.7	0.3	0.4	2	250	1% percentile	0.443363	0.445542	0.0049149	0.00702579	0.441416	0.445311	0.00643524	0.443759	0.447326	FALSE	FALSE	FALSE	FALSE	TRUE
34	0.7	0.3	0.4	2	500	1% percentile	0.457641	0.458615	0.00212714	0.00312509	0.456271	0.459011	0.00264762	0.457454	0.459775	FALSE	FALSE	FALSE	TRUE	FALSE
35	0.7	0.3	0.4	2	1000	1% percentile	0.467702	0.468558	0.0018317	0.0030531	0.465025	0.470378	0.00230424	0.466539	0.470578	FALSE	FALSE	FALSE	TRUE	FALSE
36	0.7	0.3	0.4	10	50	1% percentile	0.396533	0.398093	0.00393294	0.0161272	0.39512	0.397947	0.0152098	0.39676	0.399426	FALSE	FALSE	FALSE	FALSE	TRUE
37	0.7	0.3	0.4	10	100	1% percentile	0.421973	0.423095	0.00265703	0.00990876	0.4206	0.423347	0.00932653	0.421802	0.424387	FALSE	FALSE	FALSE	TRUE	FALSE
38	0.7	0.3	0.4	10	250	1% percentile	0.445119	0.445462	0.000772384	0.00620229	0.443399	0.446838	0.00610903	0.443769	0.447156	FALSE	FALSE	FALSE	TRUE	FALSE
39	0.7	0.3	0.4	10	500	1% percentile	0.458274	0.458848	0.00125368	0.00304643	0.456939	0.459609	0.00252415	0.457742	0.459955	FALSE	FALSE	FALSE	TRUE	FALSE
40	0.7	0.3	0.4	10	1000	1% percentile	0.467821	0.468073	0.00053894	0.00255421	0.465582	0.47006	0.00272006	0.465689	0.470458	FALSE	FALSE	FALSE	TRUE	FALSE
41	0.8	0.4	0.4	2	50	1% percentile	0.517859	0.525544	0.0148389	0.0235031	0.515799	0.519919	0.0195912	0.523826	0.527261	FALSE	FALSE	FALSE	FALSE	TRUE
42	0.8	0.4	0.4	2	100	1% percentile	0.552859	0.558364	0.00995821	0.0131075	0.551042	0.554675	0.0110797	0.556829	0.5599	FALSE	FALSE	FALSE	FALSE	TRUE
43	0.8	0.4	0.4	2	250	1% percentile	0.585177	0.587132	0.00334087	0.0069656	0.583246	0.587108	0.00661612	0.585298	0.588966	FALSE	FALSE	FALSE	FALSE	TRUE
44	0.8	0.4	0.4	2	500	1% percentile	0.599956	0.601035	0.00179921	0.00415614	0.598134	0.601777	0.00373316	0.599399	0.602672	FALSE	FALSE	FALSE	TRUE	FALSE
45	0.8	0.4	0.4	2	1000	1% percentile	0.613289	0.613906	0.00100578	0.00171655	0.611784	0.614794	0.00147643	0.612612	0.6152	FALSE	FALSE	FALSE	TRUE	FALSE
46	0.8	0.4	0.4	10	50	1% percentile	0.52485	0.526768	0.00365373	0.0197166	0.523122	0.526579	0.0187108	0.525128	0.528408	FALSE	FALSE	FALSE	FALSE	TRUE
47	0.8	0.4	0.4	10	100	1% percentile	0.557218	0.55853	0.002355	0.0121856	0.555529	0.558907	0.011429	0.556946	0.560114	FALSE	FALSE	FALSE	TRUE	FALSE
48	0.8	0.4	0.4	10	250	1% percentile	0.588207	0.588279	0.000122373	0.00645021	0.586419	0.589995	0.00609825	0.586589	0.589969	FALSE	FALSE	FALSE	TRUE	FALSE
49	0.8	0.4	0.4	10	500	1% percentile	0.602562	0.603021	0.000761847	0.00276968	0.601348	0.603776	0.00287295	0.601762	0.60428	FALSE	FALSE	FALSE	TRUE	FALSE
50	0.8	0.4	0.4	10	1000	1% percentile	0.613946	0.614413	0.000761264	0.00228889	0.61194	0.615952	0.00238516	0.612323	0.616504	FALSE	FALSE	FALSE	TRUE	FALSE
51	0.9	0.1	0.8	2	50	1% percentile	0.606764	0.621502	0.02429	0.043604	0.602941	0.610586	0.0351417	0.618422	0.624582	FALSE	FALSE	FALSE	FALSE	TRUE
52	0.9	0.1	0.8	2	100	1% percentile	0.663433	0.675052	0.017513	0.0259252	0.65984	0.667026	0.0216495	0.672051	0.678052	FALSE	FALSE	FALSE	FALSE	TRUE
53	0.9	0.1	0.8	2	250	1% percentile	0.715364	0.720719	0.00748669	0.016273	0.710853	0.719874	0.0127209	0.717193	0.724245	FALSE	FALSE	FALSE	FALSE	TRUE
54	0.9	0.1	0.8	2	500	1% percentile	0.742531	0.744926	0.00322581	0.00751391	0.739238	0.745824	0.00793408	0.741449	0.748403	FALSE	FALSE	FALSE	TRUE	FALSE
55	0.9	0.1	0.8	2	1000	1% percentile	0.761838	0.764136	0.00301605	0.00343223	0.75883	0.764847	0.00312639	0.761396	0.766877	FALSE	FALSE	FALSE	TRUE	FALSE
56	0.9	0.1	0.8	10	50	1% percentile	0.621518	0.6257	0.00672829	0.0360045	0.618362	0.624674	0.0344225	0.622682	0.628717	FALSE	FALSE	FALSE	FALSE	TRUE
57	0.9	0.1	0.8	10	100	1% percentile	0.671457	0.675474	0.00598248	0.024345	0.668083	0.674831	0.0233886	0.672233	0.678716	FALSE	FALSE	FALSE	FALSE	TRUE
58	0.9	0.1	0.8	10	250	1% percentile	0.721163	0.722085	0.00127875	0.0128209	0.717609	0.724716	0.0128007	0.718537	0.725633	FALSE	FALSE	FALSE	TRUE	FALSE
59	0.9	0.1	0.8	10	500	1% percentile	0.746247	0.746644	0.000531927	0.00630026	0.743486	0.749008	0.00602719	0.744003	0.749286	FALSE	FALSE	FALSE	TRUE	FALSE
60	0.9	0.1	0.8	10	1000	1% percentile	0.764638	0.766317	0.00219651	0.0021533	0.76275	0.766525	0.00172086	0.764809	0.767826	FALSE	FALSE	FALSE	TRUE	FALSE
61	1	0	1	2	50	1% percentile	0.720372	0.766946	0.0646526	0.0661569	0.714573	0.726171	0.0480859	0.762731	0.77116	FALSE	FALSE	FALSE	FALSE	TRUE
62	1	0	1	2	100	1% percentile	0.80245	0.835778	0.0415332	0.0373579	0.797272	0.807627	0.0288684	0.831777	0.839779	FALSE	FALSE	FALSE	FALSE	TRUE
63	1	0	1	2	250	1% percentile	0.871026	0.89543	0.028018	0.0245752	0.864214	0.877838	0.0132085	0.891769	0.899091	FALSE	FALSE	FALSE	FALSE	TRUE
64	1	0	1	2	500	1% percentile	0.91206	0.928541	0.0180701	0.00999738	0.907679	0.916442	0.00768672	0.925172	0.93191	FALSE	FALSE	FALSE	FALSE	TRUE
65	1	0	1	2	1000	1% percentile	0.940156	0.951263	0.0118139	0.00445343	0.936253	0.94406	0.00634787	0.945699	0.956827	FALSE	FALSE	FALSE	FALSE	TRUE
66	1	0	1	10	50	1% percentile	0.752631	0.77029	0.0234642	0.0512809	0.748136	0.757126	0.0466179	0.766204	0.774377	FALSE	FALSE	FALSE	FALSE	TRUE
67	1	0	1	10	100	1% percentile	0.830526	0.841353	0.0130353	0.0306567	0.826278	0.834775	0.0261836	0.837724	0.844981	FALSE	FALSE	FALSE	FALSE	TRUE
68	1	0	1	10	250	1% percentile	0.8918	0.89836	0.00735623	0.0159576	0.887377	0.896223	0.0150963	0.894176	0.902545	FALSE	FALSE	FALSE	FALSE	TRUE
69	1	0	1	10	500	1% percentile	0.923654	0.927634	0.00430854	0.00986266	0.919332	0.927977	0.00908955	0.92365	0.931618	FALSE	FALSE	FALSE	TRUE	FALSE
70	1	0	1	10	1000	1% percentile	0.945975	0.950901	0.00520714	0.0016842	0.944499	0.947452	0.00360098	0.947745	0.954058	FALSE	FALSE	FALSE	FALSE	TRUE
71	1	0.9	0.1	2	50	1% percentile	0.913851	0.928356	0.0158721	0.0100311	0.912972	0.91473	0.00746785	0.927701	0.92901	FALSE	FALSE	FALSE	FALSE	TRUE
72	1	0.9	0.1	2	100	1% percentile	0.939956	0.949995	0.0106799	0.00662791	0.939038	0.940875	0.00516866	0.949279	0.950711	FALSE	FALSE	FALSE	FALSE	TRUE
73	1	0.9	0.1	2	250	1% percentile	0.962941	0.968169	0.00542978	0.00375396	0.9619	0.963981	0.00241817	0.967499	0.96884	FALSE	FALSE	FALSE	FALSE	TRUE
74	1	0.9	0.1	2	500	1% percentile	0.97446	0.977663	0.00328733	0.00191343	0.973621	0.975299	0.00192107	0.976821	0.978505	FALSE	FALSE	FALSE	FALSE	TRUE
75	1	0.9	0.1	2	1000	1% percentile	0.981616	0.984455	0.00289288	0.000896966	0.980829	0.982402	0.000453423	0.984058	0.984853	FALSE	FALSE	FALSE	FALSE	TRUE
76	1	0.9	0.1	10	50	1% percentile	0.924553	0.929855	0.00573542	0.00825488	0.923829	0.925276	0.00697507	0.929244	0.930467	FALSE	FALSE	FALSE	FALSE	TRUE
77	1	0.9	0.1	10	100	1% percentile	0.945453	0.949165	0.00392665	0.00537263	0.944708	0.946197	0.00449072	0.948543	0.949788	FALSE	FALSE	FALSE	FALSE	TRUE
78	1	0.9	0.1	10	250	1% percentile	0.966885	0.968765	0.00194445	0.002698	0.966137	0.967632	0.00226583	0.968137	0.969393	FALSE	FALSE	FALSE	FALSE	TRUE
79	1	0.9	0.1	10	500	1% percentile	0.977325	0.978467	0.0011686	0.00178194	0.976544	0.978106	0.00157518	0.977777	0.979158	FALSE	FALSE	FALSE	FALSE	TRUE
80	1	0.9	0.1	10	1000	1% percentile	0.983564	0.984273	0.000720464	0.000358678	0.98325	0.983879	0.000505684	0.98383	0.984716	FALSE	FALSE	FALSE	FALSE	TRUE
1	0.1	0	0.1	2	50	2% percentile	0.00651122	0.00666684	0.0239007	0.000788907	0.00644207	0.00658037	0.000783275	0.00659819	0.0067355	FALSE	FALSE	FALSE	FALSE	TRUE
2	0.1	0	0.1	2	100	2% percentile	0.00757249	0.00767352	0.0133413	0.000439466	0.00751159	0.0076334	0.000447627	0.00761148	0.00773556	FALSE	FALSE	FALSE	FALSE	TRUE
3	0.1	0	0.1	2	250	2% percentile	0.00854378	0.00858486	0.00480836	0.000239986	0.00847726	0.0086103	0.00023334	0.00852018	0.00864954	FALSE	FALSE	FALSE	TRUE	FALSE
4	0.1	0	0.1	2	500	2% percentile	0.00898658	0.00902081	0.00380883	0.000100843	0.00894239	0.00903078	8.70053e-05	0.00898268	0.00905894	FALSE	FALSE	FALSE	TRUE	FALSE
5	0.1	0	0.1	2	1000	2% percentile	0.00928795	0.00931813	0.00324938	7.97438e-05	0.00921805	0.00935785	6.21273e-05	0.00926367	0.00937259	FALSE	FALSE	FALSE	TRUE	FALSE
6	0.1	0	0.1	10	50	2% percentile	0.00727163	0.00731456	0.00590422	0.000566321	0.00722199	0.00732127	0.000565407	0.007265	0.00736412	FALSE	FALSE	FALSE	TRUE	FALSE
7	0.1	0	0.1	10	100	2% percentile	0.00806014	0.00807836	0.00226081	0.000337969	0.00801329	0.00810698	0.00033189	0.00803236	0.00812436	FALSE	FALSE	FALSE	TRUE	FALSE
8	0.1	0	0.1	10	250	2% percentile	0.00876202	0.00877423	0.00139435	0.000201443	0.00870618	0.00881785	0.000190344	0.00872147	0.00882699	FALSE	FALSE	FALSE	TRUE	FALSE
9	0.1	0	0.1	10	500	2% percentile	0.00911827	0.00911836	1.01344e-05	8.84997e-05	0.00907948	0.00915705	8.83129e-05	0.00907966	0.00915706	FALSE	FALSE	FALSE	TRUE	FALSE
10	0.1	0	0.1	10	1000	2% percentile	0.00941219	0.00941214	-5.67947e-06	3.34879e-05	0.00938284	0.00944154	3.32719e-05	0.00938297	0.0094413	FALSE	TRUE	FALSE	FALSE	FALSE
11	0.55	0.45	0.1	2	50	2% percentile	0.267351	0.268931	0.00590932	0.00469578	0.266939	0.267762	0.00423	0.26856	0.269301	FALSE	FALSE	FALSE	FALSE	TRUE
12	0.55	0.45	0.1	2	100	2% percentile	0.277551	0.27864	0.00392202	0.00293639	0.277144	0.277958	0.00278483	0.278254	0.279026	FALSE	FALSE	FALSE	FALSE	TRUE
13	0.55	0.45	0.1	2	250	2% percentile	0.287419	0.287803	0.00133637	0.00177605	0.286927	0.287912	0.0017271	0.287325	0.288282	FALSE	FALSE	FALSE	TRUE	FALSE
14	0.55	0.45	0.1	2	500	2% percentile	0.29134	0.291689	0.00119737	0.000757967	0.291008	0.291672	0.000649072	0.291404	0.291973	FALSE	FALSE	FALSE	FALSE	TRUE
15	0.55	0.45	0.1	2	1000	2% percentile	0.294785	0.29502	0.000799516	0.000552708	0.2943	0.295269	0.000431065	0.294643	0.295398	FALSE	FALSE	FALSE	TRUE	FALSE
16	0.55	0.45	0.1	10	50	2% percentile	0.268888	0.269361	0.00175751	0.00424233	0.268516	0.26926	0.00408157	0.269003	0.269718	FALSE	FALSE	FALSE	FALSE	TRUE
17	0.55	0.45	0.1	10	100	2% percentile	0.278599	0.27883	0.000829348	0.00261085	0.278237	0.278961	0.00259713	0.27847	0.27919	FALSE	FALSE	FALSE	TRUE	FALSE
18	0.55	0.45	0.1	10	250	2% percentile	0.287256	0.28735	0.000327295	0.00117891	0.28693	0.287583	0.00115227	0.287031	0.28767	FALSE	FALSE	FALSE	TRUE	FALSE
19	0.55	0.45	0.1	10	500	2% percentile	0.291848	0.291969	0.000413344	0.000904548	0.291452	0.292244	0.000896045	0.291576	0.292361	FALSE	FALSE	FALSE	TRUE	FALSE
20	0.55	0.45	0.1	10	1000	2% percentile	0.295177	0.295142	-0.000118253	0.000526588	0.294715	0.295638	0.000462292	0.294737	0.295547	FALSE	TRUE	FALSE	FALSE	FALSE
21	0.6	0.2	0.4	2	50	2% percentile	0.279832	0.284451	0.016504	0.015819	0.278446	0.281219	0.0136591	0.283253	0.285648	FALSE	FALSE	FALSE	FALSE	TRUE
22	0.6	0.2	0.4	2	100	2% percentile	0.30127	0.30486	0.0119149	0.00898113	0.300025	0.302515	0.0081046	0.303736	0.305983	FALSE	FALSE	FALSE	FALSE	TRUE
23	0.6	0.2	0.4	2	250	2% percentile	0.32318	0.325443	0.00700014	0.00418596	0.32202	0.324341	0.00374574	0.324404	0.326481	FALSE	FALSE	FALSE	FALSE	TRUE
24	0.6	0.2	0.4	2	500	2% percentile	0.336	0.336921	0.0027418	0.00285407	0.334749	0.337251	0.00254355	0.335807	0.338036	FALSE	FALSE	FALSE	TRUE	FALSE
25	0.6	0.2	0.4	2	1000	2% percentile	0.341516	0.342225	0.00207546	0.00210603	0.33967	0.343362	0.00251861	0.340017	0.344432	FALSE	FALSE	FALSE	TRUE	FALSE
26	0.6	0.2	0.4	10	50	2% percentile	0.285236	0.286612	0.00482184	0.0136013	0.284044	0.286429	0.0134584	0.285432	0.287791	FALSE	FALSE	FALSE	FALSE	TRUE
27	0.6	0.2	0.4	10	100	2% percentile	0.305228	0.306227	0.0032758	0.00788596	0.304135	0.306321	0.00750545	0.305187	0.307268	FALSE	FALSE	FALSE	TRUE	FALSE
28	0.6	0.2	0.4	10	250	2% percentile	0.326489	0.326924	0.00133216	0.0037584	0.325448	0.327531	0.00405532	0.3258	0.328048	FALSE	FALSE	FALSE	TRUE	FALSE
29	0.6	0.2	0.4	10	500	2% percentile	0.335201	0.335665	0.00138326	0.00360863	0.333619	0.336783	0.00323632	0.334246	0.337083	FALSE	FALSE	FALSE	TRUE	FALSE
30	0.6	0.2	0.4	10	1000	2% percentile	0.342646	0.342678	9.40571e-05	0.00172071	0.341137	0.344154	0.00172025	0.34117	0.344186	FALSE	FALSE	FALSE	TRUE	FALSE
31	0.7	0.3	0.4	2	50	2% percentile	0.390807	0.395904	0.0130417	0.0189594	0.389145	0.392469	0.0166009	0.394449	0.397359	FALSE	FALSE	FALSE	FALSE	TRUE
32	0.7	0.3	0.4	2	100	2% percentile	0.419451	0.422594	0.00749288	0.0114597	0.417863	0.421039	0.0101763	0.421184	0.424005	FALSE	FALSE	FALSE	FALSE	TRUE
33	0.7	0.3	0.4	2	250	2% percentile	0.444054	0.446008	0.00440056	0.00699286	0.442116	0.445992	0.00652175	0.4442	0.447816	FALSE	FALSE	FALSE	FALSE	TRUE
34	0.7	0.3	0.4	2	500	2% percentile	0.45826	0.459008	0.00163132	0.00285628	0.457008	0.459512	0.0026577	0.457843	0.460173	FALSE	FALSE	FALSE	TRUE	FALSE
35	0.7	0.3	0.4	2	1000	2% percentile	0.468146	0.468792	0.00137913	0.00307393	0.465452	0.470841	0.00240434	0.466685	0.4709	FALSE	FALSE	FALSE	TRUE	FALSE
36	0.7	0.3	0.4	10	50	2% percentile	0.397301	0.398722	0.0035763	0.0160701	0.395893	0.39871	0.0152464	0.397386	0.400059	FALSE	FALSE	FALSE	FALSE	TRUE
37	0.7	0.3	0.4	10	100	2% percentile	0.42259	0.423596	0.00238189	0.00983409	0.421227	0.423953	0.00935814	0.422299	0.424893	FALSE	FALSE	FALSE	TRUE	FALSE
38	0.7	0.3	0.4	10	250	2% percentile	0.44559	0.445746	0.000350511	0.00608611	0.443903	0.447277	0.00609278	0.444058	0.447435	FALSE	FALSE	FALSE	TRUE	FALSE
39	0.7	0.3	0.4	10	500	2% percentile	0.458667	0.459117	0.00098122	0.00301176	0.457347	0.459987	0.00250635	0.458018	0.460215	FALSE	FALSE	FALSE	TRUE	FALSE
40	0.7	0.3	0.4	10	1000	2% percentile	0.468112	0.468324	0.000453157	0.00249451	0.465925	0.470298	0.00275344	0.46591	0.470737	FALSE	FALSE	FALSE	TRUE	FALSE
41	0.8	0.4	0.4	2	50	2% percentile	0.519358	0.526336	0.0134361	0.0232374	0.517321	0.521395	0.0196203	0.524616	0.528056	FALSE	FALSE	FALSE	FALSE	TRUE
42	0.8	0.4	0.4	2	100	2% percentile	0.554183	0.559008	0.00870721	0.0129115	0.552393	0.555972	0.0111073	0.557469	0.560548	FALSE	FALSE	FALSE	FALSE	TRUE
43	0.8	0.4	0.4	2	250	2% percentile	0.586213	0.587655	0.00245981	0.00689109	0.584303	0.588124	0.00677171	0.585778	0.589532	FALSE	FALSE	FALSE	TRUE	FALSE
44	0.8	0.4	0.4	2	500	2% percentile	0.600639	0.601448	0.00134788	0.00378227	0.598981	0.602297	0.00375962	0.599801	0.603096	FALSE	FALSE	FALSE	TRUE	FALSE
45	0.8	0.4	0.4	2	1000	2% percentile	0.613757	0.614103	0.000562451	0.0018577	0.612129	0.615386	0.00147292	0.612811	0.615394	FALSE	FALSE	FALSE	TRUE	FALSE
46	0.8	0.4	0.4	10	50	2% percentile	0.525857	0.527557	0.00323266	0.0196529	0.524134	0.527579	0.0187549	0.525913	0.529201	FALSE	FALSE	FALSE	TRUE	FALSE
47	0.8	0.4	0.4	10	100	2% percentile	0.558079	0.559115	0.00185786	0.0122201	0.556385	0.559772	0.011527	0.557518	0.560713	FALSE	FALSE	FALSE	TRUE	FALSE
48	0.8	0.4	0.4	10	250	2% percentile	0.588655	0.588733	0.000133508	0.00641854	0.586875	0.590434	0.00608322	0.587047	0.590419	FALSE	FALSE	FALSE	TRUE	FALSE
49	0.8	0.4	0.4	10	500	2% percentile	0.603129	0.603306	0.000293805	0.00277901	0.601911	0.604347	0.00287954	0.602044	0.604568	FALSE	FALSE	FALSE	TRUE	FALSE
50	0.8	0.4	0.4	10	1000	2% percentile	0.614248	0.61455	0.00049166	0.00245162	0.612099	0.616396	0.00239008	0.612455	0.616645	FALSE	FALSE	FALSE	TRUE	FALSE
51	0.9	0.1	0.8	2	50	2% percentile	0.608811	0.622666	0.0227578	0.0430794	0.605035	0.612587	0.0351881	0.619582	0.625751	FALSE	FALSE	FALSE	FALSE	TRUE
52	0.9	0.1	0.8	2	100	2% percentile	0.665328	0.675926	0.0159296	0.0255186	0.661791	0.668865	0.0217068	0.672918	0.678935	FALSE	FALSE	FALSE	FALSE	TRUE
53	0.9	0.1	0.8	2	250	2% percentile	0.716909	0.721258	0.00606578	0.0159711	0.712483	0.721336	0.0127242	0.717731	0.724785	FALSE	FALSE	FALSE	TRUE	FALSE
54	0.9	0.1	0.8	2	500	2% percentile	0.743566	0.745568	0.00269275	0.00737228	0.740335	0.746797	0.00785468	0.742126	0.749011	FALSE	FALSE	FALSE	TRUE	FALSE
55	0.9	0.1	0.8	2	1000	2% percentile	0.763712	0.764592	0.00115345	0.00346825	0.760672	0.766752	0.00338721	0.761623	0.767562	FALSE	FALSE	FALSE	TRUE	FALSE
56	0.9	0.1	0.8	10	50	2% percentile	0.62305	0.626826	0.00606006	0.0358165	0.619911	0.62619	0.0344139	0.62381	0.629843	FALSE	FALSE	FALSE	FALSE	TRUE
57	0.9	0.1	0.8	10	100	2% percentile	0.672702	0.676227	0.00523983	0.0242162	0.669346	0.676058	0.0234622	0.672975	0.679478	FALSE	FALSE	FALSE	FALSE	TRUE
58	0.9	0.1	0.8	10	250	2% percentile	0.722126	0.722879	0.00104273	0.0128128	0.718575	0.725678	0.0128221	0.719325	0.726433	FALSE	FALSE	FALSE	TRUE	FALSE
59	0.9	0.1	0.8	10	500	2% percentile	0.746969	0.7472	0.000310174	0.00636531	0.744179	0.749758	0.00614726	0.744506	0.749894	FALSE	FALSE	FALSE	TRUE	FALSE
60	0.9	0.1	0.8	10	1000	2% percentile	0.76544	0.766684	0.00162588	0.00227913	0.763442	0.767437	0.00147397	0.765392	0.767976	FALSE	FALSE	FALSE	TRUE	FALSE
61	1	0	1	2	50	2% percentile	0.724026	0.768468	0.0613813	0.0648097	0.718345	0.729707	0.0481957	0.764243	0.772692	FALSE	FALSE	FALSE	FALSE	TRUE
62	1	0	1	2	100	2% percentile	0.805752	0.836835	0.038577	0.0362605	0.800726	0.810777	0.0289049	0.832829	0.840841	FALSE	FALSE	FALSE	FALSE	TRUE
63	1	0	1	2	250	2% percentile	0.873645	0.896122	0.0257282	0.023501	0.867131	0.880159	0.0132224	0.892457	0.899787	FALSE	FALSE	FALSE	FALSE	TRUE
64	1	0	1	2	500	2% percentile	0.914699	0.928999	0.0156332	0.00908181	0.910719	0.918679	0.00776221	0.925597	0.932401	FALSE	FALSE	FALSE	FALSE	TRUE
65	1	0	1	2	1000	2% percentile	0.941317	0.951642	0.0109687	0.00455122	0.937328	0.945306	0.00643266	0.946003	0.95728	FALSE	FALSE	FALSE	FALSE	TRUE
66	1	0	1	10	50	2% percentile	0.755071	0.77164	0.0219438	0.0507986	0.750618	0.759524	0.0465783	0.767557	0.775723	FALSE	FALSE	FALSE	FALSE	TRUE
67	1	0	1	10	100	2% percentile	0.832757	0.842545	0.0117526	0.0303849	0.828546	0.836969	0.0263602	0.838891	0.846198	FALSE	FALSE	FALSE	FALSE	TRUE
68	1	0	1	10	250	2% percentile	0.893462	0.899132	0.00634591	0.0158206	0.889077	0.897848	0.015181	0.894924	0.90334	FALSE	FALSE	FALSE	FALSE	TRUE
69	1	0	1	10	500	2% percentile	0.925201	0.928227	0.00327133	0.00891977	0.921291	0.92911	0.00904621	0.924263	0.932192	FALSE	FALSE	FALSE	TRUE	FALSE
70	1	0	1	10	1000	2% percentile	0.946869	0.951386	0.00477047	0.00238142	0.944781	0.948956	0.00338749	0.948417	0.954355	FALSE	FALSE	FALSE	FALSE	TRUE
71	1	0.9	0.1	2	50	2% percentile	0.916211	0.928893	0.0138415	0.00962087	0.915368	0.917054	0.00753845	0.928232	0.929554	FALSE	FALSE	FALSE	FALSE	TRUE
72	1	0.9	0.1	2	100	2% percentile	0.942122	0.950404	0.00879107	0.00638629	0.941237	0.943007	0.00527453	0.949673	0.951135	FALSE	FALSE	FALSE	FALSE	TRUE
73	1	0.9	0.1	2	250	2% percentile	0.964236	0.968439	0.00435882	0.00370748	0.963208	0.965264	0.00241912	0.967768	0.969109	FALSE	FALSE	FALSE	FALSE	TRUE
74	1	0.9	0.1	2	500	2% percentile	0.975487	0.977786	0.00235716	0.00173745	0.974725	0.976248	0.00193848	0.976936	0.978636	FALSE	FALSE	FALSE	FALSE	TRUE
75	1	0.9	0.1	2	1000	2% percentile	0.98257	0.984646	0.00211251	0.000898432	0.981782	0.983357	0.000461379	0.984241	0.98505	FALSE	FALSE	FALSE	FALSE	TRUE
76	1	0.9	0.1	10	50	2% percentile	0.925979	0.930431	0.00480837	0.00807165	0.925272	0.926687	0.00709946	0.929809	0.931054	FALSE	FALSE	FALSE	FALSE	TRUE
77	1	0.9	0.1	10	100	2% percentile	0.946648	0.949559	0.00307565	0.00524472	0.945921	0.947375	0.00454798	0.948929	0.95019	FALSE	FALSE	FALSE	FALSE	TRUE
78	1	0.9	0.1	10	250	2% percentile	0.967762	0.969069	0.001351	0.00269945	0.967013	0.96851	0.00227118	0.96844	0.969699	FALSE	FALSE	FALSE	FALSE	TRUE
79	1	0.9	0.1	10	500	2% percentile	0.977849	0.978674	0.000844064	0.00178795	0.977065	0.978632	0.00162325	0.977963	0.979385	FALSE	FALSE	FALSE	FALSE	TRUE
80	1	0.9	0.1	10	1000	2% percentile	0.983912	0.984428	0.000524242	0.000409101	0.983553	0.98427	0.000591594	0.983909	0.984946	FALSE	FALSE	FALSE	FALSE	TRUE
1	0.1	0	0.1	2	50	5% percentile	0.00665856	0.0068091	0.0226086	0.000748296	0.00659297	0.00672415	0.000749169	0.00674343	0.00687477	FALSE	FALSE	FALSE	FALSE	TRUE
2	0.1	0	0.1	2	100	5% percentile	0.00770893	0.00779918	0.0117081	0.000410826	0.00765199	0.00776586	0.000419494	0.00774104	0.00785732	FALSE	FALSE	FALSE	FALSE	TRUE
3	0.1	0	0.1	2	250	5% percentile	0.00865093	0.00868501	0.00393939	0.000239854	0.00858445	0.00871742	0.000220539	0.00862388	0.00874614	FALSE	FALSE	FALSE	TRUE	FALSE
4	0.1	0	0.1	2	500	5% percentile	0.00905774	0.00907966	0.00241982	9.74424e-05	0.00901504	0.00910045	9.63974e-05	0.00903741	0.00912191	FALSE	FALSE	FALSE	TRUE	FALSE
5	0.1	0	0.1	2	1000	5% percentile	0.00934131	0.00935525	0.00149242	7.03122e-05	0.00927968	0.00940294	6.30757e-05	0.00929996	0.00941054	FALSE	FALSE	FALSE	TRUE	FALSE
6	0.1	0	0.1	10	50	5% percentile	0.00735554	0.00739356	0.00516915	0.000558993	0.00730654	0.00740453	0.000556606	0.00734477	0.00744235	FALSE	FALSE	FALSE	TRUE	FALSE
7	0.1	0	0.1	10	100	5% percentile	0.0081386	0.00815388	0.00187697	0.000337612	0.00809181	0.00818539	0.000329107	0.00810827	0.00819949	FALSE	FALSE	FALSE	TRUE	FALSE
8	0.1	0	0.1	10	250	5% percentile	0.00882659	0.00883751	0.00123774	0.00019692	0.008772	0.00888117	0.000186968	0.00878569	0.00888934	FALSE	FALSE	FALSE	TRUE	FALSE
9	0.1	0	0.1	10	500	5% percentile	0.00914799	0.00914839	4.37751e-05	8.40704e-05	0.00911114	0.00918483	8.41006e-05	0.00911153	0.00918525	FALSE	FALSE	FALSE	TRUE	FALSE
10	0.1	0	0.1	10	1000	5% percentile	0.0094421	0.00944221	1.17738e-05	3.74281e-05	0.00940929	0.00947491	3.74392e-05	0.0094094	0.00947503	FALSE	FALSE	FALSE	TRUE	FALSE
11	0.55	0.45	0.1	2	50	5% percentile	0.268954	0.269992	0.00385734	0.00479128	0.268534	0.269374	0.0042844	0.269616	0.270367	FALSE	FALSE	FALSE	FALSE	TRUE
12	0.55	0.45	0.1	2	100	5% percentile	0.278731	0.279363	0.00226882	0.00292554	0.278325	0.279136	0.00283785	0.27897	0.279756	FALSE	FALSE	FALSE	FALSE	TRUE
13	0.55	0.45	0.1	2	250	5% percentile	0.288001	0.288168	0.000578353	0.00171093	0.287527	0.288475	0.00171924	0.287691	0.288644	FALSE	FALSE	FALSE	TRUE	FALSE
14	0.55	0.45	0.1	2	500	5% percentile	0.291874	0.291993	0.000408432	0.00077843	0.291532	0.292215	0.000681421	0.291694	0.292292	FALSE	FALSE	FALSE	TRUE	FALSE
15	0.55	0.45	0.1	2	1000	5% percentile	0.295044	0.295176	0.000445749	0.000466216	0.294636	0.295453	0.000420163	0.294807	0.295544	FALSE	FALSE	FALSE	TRUE	FALSE
16	0.55	0.45	0.1	10	50	5% percentile	0.269919	0.270147	0.00084482	0.00429851	0.269542	0.270296	0.0041485	0.269784	0.270511	FALSE	FALSE	FALSE	TRUE	FALSE
17	0.55	0.45	0.1	10	100	5% percentile	0.279366	0.279438	0.000257497	0.0026965	0.278992	0.27974	0.00266074	0.279069	0.279807	FALSE	FALSE	FALSE	TRUE	FALSE
18	0.55	0.45	0.1	10	250	5% percentile	0.287653	0.287676	8.03194e-05	0.00111146	0.287345	0.287961	0.00111195	0.287368	0.287984	FALSE	FALSE	FALSE	TRUE	FALSE
19	0.55	0.45	0.1	10	500	5% percentile	0.292221	0.292207	-4.61483e-05	0.000954619	0.291802	0.292639	0.00096055	0.291786	0.292628	FALSE	TRUE	FALSE	FALSE	FALSE
20	0.55	0.45	0.1	10	1000	5% percentile	0.295348	0.295344	-1.24174e-05	0.000560726	0.294856	0.295839	0.000532218	0.294877	0.29581	FALSE	TRUE	FALSE	FALSE	FALSE
21	0.6	0.2	0.4	2	50	5% percentile	0.282602	0.286269	0.0129729	0.0153492	0.281257	0.283948	0.0135668	0.28508	0.287458	FALSE	FALSE	FALSE	FALSE	TRUE
22	0.6	0.2	0.4	2	100	5% percentile	0.303903	0.306348	0.00804355	0.00879486	0.302684	0.305122	0.00819265	0.305212	0.307483	FALSE	FALSE	FALSE	FALSE	TRUE
23	0.6	0.2	0.4	2	250	5% percentile	0.32485	0.326234	0.00426255	0.00402224	0.323735	0.325965	0.00369798	0.325209	0.327259	FALSE	FALSE	FALSE	FALSE	TRUE
24	0.6	0.2	0.4	2	500	5% percentile	0.337294	0.337666	0.0011044	0.00280305	0.336065	0.338522	0.00269	0.336487	0.338845	FALSE	FALSE	FALSE	TRUE	FALSE
25	0.6	0.2	0.4	2	1000	5% percentile	0.342117	0.342592	0.00138825	0.00221497	0.340176	0.344059	0.00256897	0.34034	0.344844	FALSE	FALSE	FALSE	TRUE	FALSE
26	0.6	0.2	0.4	10	50	5% percentile	0.287171	0.288162	0.00345233	0.0136185	0.285977	0.288364	0.013583	0.286971	0.289353	FALSE	FALSE	FALSE	TRUE	FALSE
27	0.6	0.2	0.4	10	100	5% percentile	0.306831	0.307413	0.00189489	0.00796584	0.305727	0.307935	0.00762092	0.306357	0.308469	FALSE	FALSE	FALSE	TRUE	FALSE
28	0.6	0.2	0.4	10	250	5% percentile	0.327563	0.327748	0.000563956	0.00399253	0.326457	0.32867	0.0042106	0.326581	0.328915	FALSE	FALSE	FALSE	TRUE	FALSE
29	0.6	0.2	0.4	10	500	5% percentile	0.335887	0.336241	0.00105366	0.00357532	0.33432	0.337454	0.00318361	0.334846	0.337636	FALSE	FALSE	FALSE	TRUE	FALSE
30	0.6	0.2	0.4	10	1000	5% percentile	0.342974	0.343041	0.000195037	0.00177102	0.341421	0.344526	0.00186721	0.341404	0.344677	FALSE	FALSE	FALSE	TRUE	FALSE
31	0.7	0.3	0.4	2	50	5% percentile	0.394248	0.398228	0.0100941	0.0185057	0.392626	0.39587	0.0165971	0.396773	0.399683	FALSE	FALSE	FALSE	FALSE	TRUE
32	0.7	0.3	0.4	2	100	5% percentile	0.422327	0.424294	0.00465727	0.0115275	0.42073	0.423925	0.0103008	0.422867	0.425722	FALSE	FALSE	FALSE	FALSE	TRUE
33	0.7	0.3	0.4	2	250	5% percentile	0.446096	0.44731	0.00272131	0.00706095	0.444139	0.448053	0.00679772	0.445426	0.449194	FALSE	FALSE	FALSE	TRUE	FALSE
34	0.7	0.3	0.4	2	500	5% percentile	0.459349	0.459789	0.0009585	0.00278864	0.458127	0.460571	0.0026852	0.458612	0.460966	FALSE	FALSE	FALSE	TRUE	FALSE
35	0.7	0.3	0.4	2	1000	5% percentile	0.469135	0.469252	0.000249504	0.00272258	0.466748	0.471521	0.00235624	0.467186	0.471317	FALSE	FALSE	FALSE	TRUE	FALSE
36	0.7	0.3	0.4	10	50	5% percentile	0.399605	0.40061	0.00251461	0.0160421	0.398199	0.401011	0.0154701	0.399254	0.401966	FALSE	FALSE	FALSE	TRUE	FALSE
37	0.7	0.3	0.4	10	100	5% percentile	0.424433	0.425096	0.00156342	0.00975073	0.423081	0.425784	0.00957094	0.42377	0.426423	FALSE	FALSE	FALSE	TRUE	FALSE
38	0.7	0.3	0.4	10	250	5% percentile	0.44677	0.446584	-0.000416333	0.0059753	0.445114	0.448426	0.00608197	0.444898	0.44827	FALSE	TRUE	FALSE	FALSE	FALSE
39	0.7	0.3	0.4	10	500	5% percentile	0.459509	0.459687	0.000388688	0.00287736	0.458248	0.46077	0.00246044	0.458609	0.460766	FALSE	FALSE	FALSE	TRUE	FALSE
40	0.7	0.3	0.4	10	1000	5% percentile	0.468567	0.468727	0.000341035	0.00282919	0.466087	0.471047	0.00307104	0.466035	0.471419	FALSE	FALSE	FALSE	TRUE	FALSE
41	0.8	0.4	0.4	2	50	5% percentile	0.523855	0.528714	0.00927592	0.0228438	0.521852	0.525857	0.0198418	0.526975	0.530453	FALSE	FALSE	FALSE	FALSE	TRUE
42	0.8	0.4	0.4	2	100	5% percentile	0.558101	0.560915	0.00504247	0.0128162	0.556325	0.559877	0.0113554	0.559341	0.562489	FALSE	FALSE	FALSE	FALSE	TRUE
43	0.8	0.4	0.4	2	250	5% percentile	0.588506	0.588909	0.000684033	0.00691876	0.586588	0.590424	0.00698687	0.586972	0.590845	FALSE	FALSE	FALSE	TRUE	FALSE
44	0.8	0.4	0.4	2	500	5% percentile	0.601888	0.602248	0.000599293	0.00394292	0.60016	0.603616	0.00362898	0.600658	0.603839	FALSE	FALSE	FALSE	TRUE	FALSE
45	0.8	0.4	0.4	2	1000	5% percentile	0.614777	0.614813	5.84492e-05	0.00177778	0.613219	0.616336	0.00194464	0.613109	0.616518	FALSE	FALSE	FALSE	TRUE	FALSE
46	0.8	0.4	0.4	10	50	5% percentile	0.528876	0.529923	0.00197904	0.0196531	0.527153	0.530599	0.019023	0.528255	0.53159	FALSE	FALSE	FALSE	TRUE	FALSE
47	0.8	0.4	0.4	10	100	5% percentile	0.560648	0.560871	0.000399356	0.012562	0.558907	0.562389	0.0119329	0.559218	0.562525	FALSE	FALSE	FALSE	TRUE	FALSE
48	0.8	0.4	0.4	10	250	5% percentile	0.590164	0.590025	-0.000234391	0.00640616	0.588388	0.591939	0.00623865	0.588296	0.591754	FALSE	TRUE	FALSE	FALSE	FALSE
49	0.8	0.4	0.4	10	500	5% percentile	0.604211	0.604262	8.45755e-05	0.00275897	0.603002	0.60542	0.00302498	0.602936	0.605588	FALSE	FALSE	FALSE	TRUE	FALSE
50	0.8	0.4	0.4	10	1000	5% percentile	0.614655	0.614943	0.000469354	0.00238107	0.612568	0.616742	0.00214779	0.613061	0.616826	FALSE	FALSE	FALSE	TRUE	FALSE
51	0.9	0.1	0.8	2	50	5% percentile	0.614954	0.62616	0.0182225	0.0419029	0.611281	0.618627	0.0354985	0.623048	0.629271	FALSE	FALSE	FALSE	FALSE	TRUE
52	0.9	0.1	0.8	2	100	5% percentile	0.671014	0.678551	0.0112326	0.0250151	0.667547	0.674481	0.022025	0.675498	0.681603	FALSE	FALSE	FALSE	FALSE	TRUE
53	0.9	0.1	0.8	2	250	5% percentile	0.721405	0.722972	0.00217193	0.0157848	0.71703	0.72578	0.0129649	0.719378	0.726565	FALSE	FALSE	FALSE	TRUE	FALSE
54	0.9	0.1	0.8	2	500	5% percentile	0.74611	0.747167	0.00141769	0.00731703	0.742903	0.749316	0.00791528	0.743698	0.750636	FALSE	FALSE	FALSE	TRUE	FALSE
55	0.9	0.1	0.8	2	1000	5% percentile	0.765433	0.765323	-0.000144676	0.00364334	0.76224	0.768627	0.00323579	0.762486	0.768159	FALSE	TRUE	FALSE	FALSE	FALSE
56	0.9	0.1	0.8	10	50	5% percentile	0.627648	0.630206	0.00407494	0.0355288	0.624534	0.630763	0.0345527	0.627177	0.633235	FALSE	FALSE	FALSE	TRUE	FALSE
57	0.9	0.1	0.8	10	100	5% percentile	0.676436	0.678484	0.00302829	0.0241011	0.673095	0.679776	0.0238064	0.675185	0.681783	FALSE	FALSE	FALSE	TRUE	FALSE
58	0.9	0.1	0.8	10	250	5% percentile	0.724843	0.725067	0.000309998	0.0130821	0.721216	0.728469	0.0129444	0.721479	0.728655	FALSE	FALSE	FALSE	TRUE	FALSE
59	0.9	0.1	0.8	10	500	5% percentile	0.748713	0.748679	-4.44859e-05	0.00642721	0.745896	0.751529	0.00639163	0.745878	0.75148	FALSE	TRUE	FALSE	FALSE	FALSE
60	0.9	0.1	0.8	10	1000	5% percentile	0.766697	0.767053	0.000463882	0.00165608	0.765246	0.768149	0.00126687	0.765943	0.768164	FALSE	FALSE	FALSE	TRUE	FALSE
61	1	0	1	2	50	5% percentile	0.734989	0.773034	0.0517626	0.0616749	0.729583	0.740395	0.04874	0.768761	0.777306	FALSE	FALSE	FALSE	FALSE	TRUE
62	1	0	1	2	100	5% percentile	0.815656	0.840006	0.0298521	0.0342602	0.810908	0.820405	0.0291958	0.835959	0.844052	FALSE	FALSE	FALSE	FALSE	TRUE
63	1	0	1	2	250	5% percentile	0.881432	0.898242	0.0190719	0.0218965	0.875362	0.887501	0.0134785	0.894506	0.901978	FALSE	FALSE	FALSE	FALSE	TRUE
64	1	0	1	2	500	5% percentile	0.920668	0.930437	0.0106111	0.00729904	0.917469	0.923867	0.00798837	0.926936	0.933938	FALSE	FALSE	FALSE	FALSE	TRUE
65	1	0	1	2	1000	5% percentile	0.945423	0.952688	0.00768468	0.00601441	0.940151	0.950694	0.00670955	0.946807	0.958569	FALSE	FALSE	FALSE	FALSE	TRUE
66	1	0	1	10	50	5% percentile	0.762392	0.775689	0.0174411	0.0498159	0.758025	0.766758	0.0466402	0.771601	0.779777	FALSE	FALSE	FALSE	FALSE	TRUE
67	1	0	1	10	100	5% percentile	0.839451	0.846121	0.00794541	0.0302263	0.835262	0.84364	0.0271326	0.84236	0.849881	FALSE	FALSE	FALSE	FALSE	TRUE
68	1	0	1	10	250	5% percentile	0.89838	0.90148	0.00345049	0.0161154	0.893913	0.902847	0.0156356	0.897146	0.905814	FALSE	FALSE	FALSE	TRUE	FALSE
69	1	0	1	10	500	5% percentile	0.928921	0.929878	0.00103069	0.00832214	0.925273	0.932568	0.00908758	0.925895	0.933861	FALSE	FALSE	FALSE	TRUE	FALSE
70	1	0	1	10	1000	5% percentile	0.950331	0.953213	0.00303247	0.00325615	0.947477	0.953185	0.00323656	0.950376	0.95605	FALSE	FALSE	FALSE	FALSE	TRUE
71	1	0.9	0.1	2	50	5% percentile	0.92179	0.930588	0.0095445	0.00926569	0.920978	0.922603	0.00774068	0.92991	0.931267	FALSE	FALSE	FALSE	FALSE	TRUE
72	1	0.9	0.1	2	100	5% percentile	0.946084	0.951787	0.00602809	0.00599897	0.945252	0.946915	0.00535053	0.951045	0.952528	FALSE	FALSE	FALSE	FALSE	TRUE
73	1	0.9	0.1	2	250	5% percentile	0.966718	0.969196	0.00256368	0.00335645	0.965787	0.967648	0.00240951	0.968528	0.969864	FALSE	FALSE	FALSE	FALSE	TRUE
74	1	0.9	0.1	2	500	5% percentile	0.976957	0.978257	0.00133016	0.00185184	0.976146	0.977769	0.00193421	0.977409	0.979104	FALSE	FALSE	FALSE	FALSE	TRUE
75	1	0.9	0.1	2	1000	5% percentile	0.983437	0.985026	0.0016154	0.00094887	0.982606	0.984269	0.000588197	0.98451	0.985541	FALSE	FALSE	FALSE	FALSE	TRUE
76	1	0.9	0.1	10	50	5% percentile	0.929511	0.932231	0.00292607	0.00797025	0.928812	0.93021	0.00746636	0.931576	0.932885	FALSE	FALSE	FALSE	FALSE	TRUE
77	1	0.9	0.1	10	100	5% percentile	0.949057	0.950779	0.00181472	0.00494141	0.948372	0.949741	0.0046773	0.950131	0.951427	FALSE	FALSE	FALSE	FALSE	TRUE
78	1	0.9	0.1	10	250	5% percentile	0.969168	0.969911	0.000767374	0.00260585	0.968445	0.96989	0.00241324	0.969242	0.97058	FALSE	FALSE	FALSE	FALSE	TRUE
79	1	0.9	0.1	10	500	5% percentile	0.978847	0.97927	0.000431671	0.00167969	0.978111	0.979583	0.00181692	0.978473	0.980066	FALSE	FALSE	FALSE	TRUE	FALSE
80	1	0.9	0.1	10	1000	5% percentile	0.984675	0.985	0.000329706	0.000287073	0.984424	0.984927	0.000587243	0.984485	0.985515	FALSE	FALSE	FALSE	FALSE	TRUE
1	0.1	0	0.1	2	50	10% percentile	0.00689998	0.0070444	0.0209307	0.000727933	0.00683618	0.00696379	0.000733386	0.00698012	0.00710869	FALSE	FALSE	FALSE	FALSE	TRUE
2	0.1	0	0.1	2	100	10% percentile	0.00789379	0.00796909	0.00954009	0.000405783	0.00783755	0.00795002	0.000399322	0.00791375	0.00802444	FALSE	FALSE	FALSE	FALSE	TRUE
3	0.1	0	0.1	2	250	10% percentile	0.00875908	0.00878886	0.00340069	0.000236106	0.00869363	0.00882452	0.000208454	0.00873108	0.00884664	FALSE	FALSE	FALSE	TRUE	FALSE
4	0.1	0	0.1	2	500	10% percentile	0.00912385	0.00914782	0.00262716	9.0651e-05	0.00908412	0.00916358	8.72665e-05	0.00910958	0.00918607	FALSE	FALSE	FALSE	TRUE	FALSE
5	0.1	0	0.1	2	1000	10% percentile	0.0093805	0.00938526	0.00050722	7.01944e-05	0.00931898	0.00944203	6.4575e-05	0.00932866	0.00944186	FALSE	FALSE	FALSE	TRUE	FALSE
6	0.1	0	0.1	10	50	10% percentile	0.00749267	0.00752375	0.0041474	0.000564527	0.00744319	0.00754215	0.000558249	0.00747481	0.00757268	FALSE	FALSE	FALSE	TRUE	FALSE
7	0.1	0	0.1	10	100	10% percentile	0.00824208	0.00825541	0.00161726	0.000340077	0.00819495	0.00828921	0.000329763	0.0082097	0.00830111	FALSE	FALSE	FALSE	TRUE	FALSE
8	0.1	0	0.1	10	250	10% percentile	0.00890019	0.00890575	0.000625256	0.000196238	0.00884579	0.00895458	0.000197067	0.00885113	0.00896038	FALSE	FALSE	FALSE	TRUE	FALSE
9	0.1	0	0.1	10	500	10% percentile	0.00918533	0.00918517	-1.72767e-05	9.57403e-05	0.00914337	0.00922729	9.60661e-05	0.00914307	0.00922728	FALSE	TRUE	FALSE	FALSE	FALSE
10	0.1	0	0.1	10	1000	10% percentile	0.00945766	0.0094573	-3.75052e-05	3.20078e-05	0.0094296	0.00948571	3.20359e-05	0.00942922	0.00948538	FALSE	TRUE	FALSE	FALSE	FALSE
11	0.55	0.45	0.1	2	50	10% percentile	0.270703	0.271389	0.00253553	0.0046395	0.270296	0.27111	0.00435177	0.271008	0.271771	FALSE	FALSE	FALSE	FALSE	TRUE
12	0.55	0.45	0.1	2	100	10% percentile	0.280055	0.280359	0.00108644	0.00294818	0.279646	0.280464	0.00288991	0.279959	0.28076	FALSE	FALSE	FALSE	TRUE	FALSE
13	0.55	0.45	0.1	2	250	10% percentile	0.288769	0.288748	-7.10222e-05	0.00169502	0.288299	0.289238	0.00172149	0.288271	0.289225	FALSE	TRUE	FALSE	FALSE	FALSE
14	0.55	0.45	0.1	2	500	10% percentile	0.292392	0.292447	0.000186833	0.000782889	0.292049	0.292736	0.000721763	0.292131	0.292763	FALSE	FALSE	FALSE	TRUE	FALSE
15	0.55	0.45	0.1	2	1000	10% percentile	0.295379	0.295513	0.000452847	0.000487998	0.294951	0.295807	0.000460191	0.295109	0.295916	FALSE	FALSE	FALSE	TRUE	FALSE
16	0.55	0.45	0.1	10	50	10% percentile	0.271236	0.271344	0.000400297	0.0043198	0.270857	0.271614	0.00427895	0.270969	0.271719	FALSE	FALSE	FALSE	TRUE	FALSE
17	0.55	0.45	0.1	10	100	10% percentile	0.280295	0.280278	-6.16131e-05	0.00281591	0.279905	0.280685	0.00276172	0.279895	0.28066	FALSE	TRUE	FALSE	FALSE	FALSE
18	0.55	0.45	0.1	10	250	10% percentile	0.288162	0.288193	0.000106843	0.00116399	0.287839	0.288485	0.00115988	0.287871	0.288514	FALSE	FALSE	FALSE	TRUE	FALSE
19	0.55	0.45	0.1	10	500	10% percentile	0.292635	0.29265	5.38159e-05	0.000997549	0.292198	0.293072	0.000988401	0.292217	0.293084	FALSE	FALSE	FALSE	TRUE	FALSE
20	0.55	0.45	0.1	10	1000	10% percentile	0.295582	0.295576	-2.17809e-05	0.000505456	0.295139	0.296025	0.000516525	0.295123	0.296028	FALSE	TRUE	FALSE	FALSE	FALSE
21	0.6	0.2	0.4	2	50	10% percentile	0.28691	0.289174	0.00789079	0.0151091	0.285585	0.288234	0.0136763	0.287975	0.290373	FALSE	FALSE	FALSE	FALSE	TRUE
22	0.6	0.2	0.4	2	100	10% percentile	0.307199	0.308398	0.0039038	0.00862464	0.306004	0.308394	0.00825999	0.307254	0.309543	FALSE	FALSE	FALSE	FALSE	TRUE
23	0.6	0.2	0.4	2	250	10% percentile	0.326691	0.327578	0.00271351	0.00359275	0.325695	0.327687	0.00363108	0.326571	0.328584	FALSE	FALSE	FALSE	TRUE	FALSE
24	0.6	0.2	0.4	2	500	10% percentile	0.338574	0.338501	-0.000216443	0.00308256	0.337223	0.339925	0.00304706	0.337166	0.339837	FALSE	TRUE	FALSE	FALSE	FALSE
25	0.6	0.2	0.4	2	1000	10% percentile	0.343306	0.34337	0.000186646	0.00239386	0.341207	0.345404	0.00258966	0.3411	0.34564	FALSE	FALSE	FALSE	TRUE	FALSE
26	0.6	0.2	0.4	10	50	10% percentile	0.290147	0.290647	0.0017224	0.013922	0.288926	0.291367	0.0139814	0.289421	0.291872	FALSE	FALSE	FALSE	TRUE	FALSE
27	0.6	0.2	0.4	10	100	10% percentile	0.308855	0.309163	0.000995459	0.00800426	0.307746	0.309965	0.00778494	0.308084	0.310242	FALSE	FALSE	FALSE	TRUE	FALSE
28	0.6	0.2	0.4	10	250	10% percentile	0.328834	0.328845	3.28013e-05	0.00425093	0.327656	0.330012	0.0042968	0.327654	0.330036	FALSE	FALSE	FALSE	TRUE	FALSE
29	0.6	0.2	0.4	10	500	10% percentile	0.336896	0.337063	0.00049552	0.00347511	0.335373	0.338419	0.00322199	0.335651	0.338475	FALSE	FALSE	FALSE	TRUE	FALSE
30	0.6	0.2	0.4	10	1000	10% percentile	0.343772	0.343694	-0.00022771	0.00156466	0.3424	0.345143	0.00191774	0.342013	0.345375	FALSE	TRUE	FALSE	FALSE	FALSE
31	0.7	0.3	0.4	2	50	10% percentile	0.399508	0.401739	0.0055831	0.0184115	0.397895	0.401122	0.016798	0.400266	0.403211	FALSE	FALSE	FALSE	FALSE	TRUE
32	0.7	0.3	0.4	2	100	10% percentile	0.425871	0.426772	0.00211602	0.011254	0.424311	0.42743	0.0103809	0.425333	0.42821	FALSE	FALSE	FALSE	TRUE	FALSE
33	0.7	0.3	0.4	2	250	10% percentile	0.448807	0.448748	-0.000130322	0.00725405	0.446796	0.450817	0.00689278	0.446838	0.450659	FALSE	TRUE	FALSE	FALSE	FALSE
34	0.7	0.3	0.4	2	500	10% percentile	0.461011	0.460871	-0.000303207	0.00299184	0.459699	0.462322	0.00275518	0.459663	0.462078	FALSE	TRUE	FALSE	FALSE	FALSE
35	0.7	0.3	0.4	2	1000	10% percentile	0.470305	0.470144	-0.000342236	0.00259089	0.468034	0.472576	0.00230843	0.46812	0.472167	FALSE	TRUE	FALSE	FALSE	FALSE
36	0.7	0.3	0.4	10	50	10% percentile	0.403128	0.403682	0.00137247	0.0162687	0.401702	0.404554	0.0159144	0.402287	0.405077	FALSE	FALSE	FALSE	TRUE	FALSE
37	0.7	0.3	0.4	10	100	10% percentile	0.427001	0.427331	0.000773456	0.0099357	0.425624	0.428378	0.00994307	0.425953	0.428709	FALSE	FALSE	FALSE	TRUE	FALSE
38	0.7	0.3	0.4	10	250	10% percentile	0.448273	0.44793	-0.000763569	0.00618141	0.446559	0.449986	0.00636118	0.446167	0.449693	FALSE	TRUE	FALSE	FALSE	FALSE
39	0.7	0.3	0.4	10	500	10% percentile	0.460586	0.460752	0.000359885	0.00266555	0.459418	0.461754	0.00249645	0.459658	0.461846	FALSE	FALSE	FALSE	TRUE	FALSE
40	0.7	0.3	0.4	10	1000	10% percentile	0.46954	0.469492	-0.000104049	0.00294905	0.466956	0.472125	0.00317495	0.466709	0.472275	FALSE	TRUE	FALSE	FALSE	FALSE
41	0.8	0.4	0.4	2	50	10% percentile	0.53045	0.532621	0.00409395	0.0228454	0.528447	0.532452	0.0203643	0.530836	0.534406	FALSE	FALSE	FALSE	FALSE	TRUE
42	0.8	0.4	0.4	2	100	10% percentile	0.562398	0.563655	0.0022349	0.0126826	0.56064	0.564155	0.011671	0.562037	0.565272	FALSE	FALSE	FALSE	TRUE	FALSE
43	0.8	0.4	0.4	2	250	10% percentile	0.591147	0.590571	-0.000973548	0.00684928	0.589248	0.593045	0.00717265	0.588583	0.592559	FALSE	TRUE	FALSE	FALSE	FALSE
44	0.8	0.4	0.4	2	500	10% percentile	0.603536	0.603556	3.419e-05	0.00358687	0.601964	0.605108	0.00367301	0.601947	0.605166	FALSE	FALSE	FALSE	TRUE	FALSE
45	0.8	0.4	0.4	2	1000	10% percentile	0.615902	0.616309	0.000660104	0.0022364	0.613942	0.617862	0.00245135	0.61416	0.618457	FALSE	FALSE	FALSE	TRUE	FALSE
46	0.8	0.4	0.4	10	50	10% percentile	0.53348	0.533818	0.000634131	0.019944	0.531731	0.535228	0.0195922	0.532101	0.535535	FALSE	FALSE	FALSE	TRUE	FALSE
47	0.8	0.4	0.4	10	100	10% percentile	0.563828	0.563652	-0.000311984	0.0125275	0.562092	0.565565	0.0123911	0.561935	0.56537	FALSE	TRUE	FALSE	FALSE	FALSE
48	0.8	0.4	0.4	10	250	10% percentile	0.59224	0.59181	-0.000725688	0.00620683	0.59052	0.593961	0.00620189	0.590091	0.593529	FALSE	TRUE	FALSE	FALSE	FALSE
49	0.8	0.4	0.4	10	500	10% percentile	0.605677	0.605454	-0.000367248	0.00259037	0.604541	0.606812	0.00282147	0.604218	0.606691	FALSE	TRUE	FALSE	FALSE	FALSE
50	0.8	0.4	0.4	10	1000	10% percentile	0.615466	0.616094	0.0010206	0.00222015	0.61352	0.617412	0.00228019	0.614095	0.618093	FALSE	FALSE	FALSE	TRUE	FALSE
51	0.9	0.1	0.8	2	50	10% percentile	0.62513	0.631952	0.0109123	0.041299	0.62151	0.62875	0.036504	0.628752	0.635152	FALSE	FALSE	FALSE	FALSE	TRUE
52	0.9	0.1	0.8	2	100	10% percentile	0.678846	0.682989	0.00610358	0.0254531	0.675318	0.682374	0.0227305	0.679839	0.68614	FALSE	FALSE	FALSE	FALSE	TRUE
53	0.9	0.1	0.8	2	250	10% percentile	0.726213	0.726026	-0.000257432	0.0156616	0.721872	0.730554	0.0137812	0.722206	0.729846	FALSE	TRUE	FALSE	FALSE	FALSE
54	0.9	0.1	0.8	2	500	10% percentile	0.749875	0.749829	-6.07447e-05	0.00704794	0.746786	0.752964	0.00766855	0.746468	0.75319	FALSE	TRUE	FALSE	FALSE	FALSE
55	0.9	0.1	0.8	2	1000	10% percentile	0.768087	0.768065	-2.98204e-05	0.00348277	0.765035	0.77114	0.00292565	0.7655	0.770629	FALSE	TRUE	FALSE	FALSE	FALSE
56	0.9	0.1	0.8	10	50	10% percentile	0.635286	0.635875	0.000926354	0.0358903	0.63214	0.638432	0.0352298	0.632787	0.638963	FALSE	FALSE	FALSE	TRUE	FALSE
57	0.9	0.1	0.8	10	100	10% percentile	0.682046	0.682463	0.00061215	0.0243806	0.678667	0.685425	0.0242757	0.679099	0.685828	FALSE	FALSE	FALSE	TRUE	FALSE
58	0.9	0.1	0.8	10	250	10% percentile	0.727883	0.727561	-0.000443247	0.012585	0.724395	0.731372	0.0131091	0.723927	0.731195	FALSE	TRUE	FALSE	FALSE	FALSE
59	0.9	0.1	0.8	10	500	10% percentile	0.751743	0.751167	-0.000765887	0.00591539	0.74915	0.754335	0.00681325	0.748181	0.754153	FALSE	TRUE	FALSE	FALSE	FALSE
60	0.9	0.1	0.8	10	1000	10% percentile	0.76873	0.76944	0.000923042	0.00179194	0.76716	0.770301	0.00125809	0.768337	0.770543	FALSE	FALSE	FALSE	TRUE	FALSE
61	1	0	1	2	50	10% percentile	0.75316	0.780665	0.03652	0.0596451	0.747932	0.758388	0.0503689	0.77625	0.78508	FALSE	FALSE	FALSE	FALSE	TRUE
62	1	0	1	2	100	10% percentile	0.829497	0.845554	0.0193569	0.0335325	0.82485	0.834145	0.0299791	0.841399	0.849709	FALSE	FALSE	FALSE	FALSE	TRUE
63	1	0	1	2	250	10% percentile	0.893043	0.901867	0.00988063	0.0187481	0.887846	0.89824	0.0142305	0.897922	0.905811	FALSE	FALSE	FALSE	FALSE	TRUE
64	1	0	1	2	500	10% percentile	0.926874	0.933614	0.00727093	0.00789594	0.923414	0.930335	0.00870532	0.929798	0.937429	FALSE	FALSE	FALSE	FALSE	TRUE
65	1	0	1	2	1000	10% percentile	0.950927	0.95511	0.0043984	0.00656532	0.945172	0.956682	0.00519774	0.950554	0.959666	FALSE	FALSE	FALSE	TRUE	FALSE
66	1	0	1	10	50	10% percentile	0.774404	0.782454	0.0103945	0.0496292	0.770054	0.778754	0.0472958	0.778308	0.786599	FALSE	FALSE	FALSE	FALSE	TRUE
67	1	0	1	10	100	10% percentile	0.849079	0.852059	0.00351	0.0304792	0.844855	0.853303	0.0283786	0.848126	0.855992	FALSE	FALSE	FALSE	TRUE	FALSE
68	1	0	1	10	250	10% percentile	0.903853	0.905108	0.00138784	0.0167386	0.899214	0.908493	0.0159956	0.900674	0.909541	FALSE	FALSE	FALSE	TRUE	FALSE
69	1	0	1	10	500	10% percentile	0.932684	0.93273	4.89355e-05	0.00852216	0.928949	0.936419	0.00928179	0.928662	0.936798	FALSE	FALSE	FALSE	TRUE	FALSE
70	1	0	1	10	1000	10% percentile	0.953621	0.955134	0.00158659	0.00317054	0.950842	0.9564	0.00306353	0.952449	0.957819	FALSE	FALSE	FALSE	TRUE	FALSE
71	1	0.9	0.1	2	50	10% percentile	0.927987	0.933319	0.0057451	0.0092097	0.92718	0.928794	0.00805978	0.932612	0.934025	FALSE	FALSE	FALSE	FALSE	TRUE
72	1	0.9	0.1	2	100	10% percentile	0.950394	0.953819	0.00360292	0.00611187	0.949547	0.951241	0.00560791	0.953041	0.954596	FALSE	FALSE	FALSE	FALSE	TRUE
73	1	0.9	0.1	2	250	10% percentile	0.969272	0.970574	0.00134242	0.00299556	0.968442	0.970103	0.00253373	0.969871	0.971276	FALSE	FALSE	FALSE	FALSE	TRUE
74	1	0.9	0.1	2	500	10% percentile	0.97859	0.979196	0.000619149	0.00163902	0.977871	0.979308	0.00196187	0.978336	0.980055	FALSE	FALSE	FALSE	TRUE	FALSE
75	1	0.9	0.1	2	1000	10% percentile	0.984765	0.985773	0.00102393	0.000757785	0.984101	0.985429	0.000694515	0.985165	0.986382	FALSE	FALSE	FALSE	FALSE	TRUE
76	1	0.9	0.1	10	50	10% percentile	0.933882	0.935144	0.00135143	0.0082694	0.933157	0.934606	0.00804418	0.934439	0.935849	FALSE	FALSE	FALSE	FALSE	TRUE
77	1	0.9	0.1	10	100	10% percentile	0.951793	0.952719	0.000973209	0.0050975	0.951087	0.9525	0.00496721	0.952031	0.953408	FALSE	FALSE	FALSE	FALSE	TRUE
78	1	0.9	0.1	10	250	10% percentile	0.971015	0.971328	0.000322534	0.00263737	0.970284	0.971746	0.00244529	0.97065	0.972006	FALSE	FALSE	FALSE	TRUE	FALSE
79	1	0.9	0.1	10	500	10% percentile	0.980102	0.980276	0.000177148	0.00177239	0.979325	0.980879	0.00178061	0.979495	0.981056	FALSE	FALSE	FALSE	TRUE	FALSE
80	1	0.9	0.1	10	1000	10% percentile	0.985429	0.985545	0.000118108	0.000579555	0.984921	0.985937	0.000745801	0.984892	0.986199	FALSE	FALSE	FALSE	TRUE	FALSE
